# Supplementary material for: Spatial-Immune Multi-omics Refines Prognostication in Early-Stage Estrogen Receptor-Positive Breast Cancer
Source: Research Square preprint supplement (doi:10.21203/rs.3.rs-7726652/v1), 2025-10-12
Supplement: Supplementary file 1 [file dddc8a58cfdb53d304879d21.docx]

**Supplementary Materials:**

Spatial-Immune Multi-omics Refines Prognostication in Early-Stage Estrogen Receptor-Positive Breast Cancer


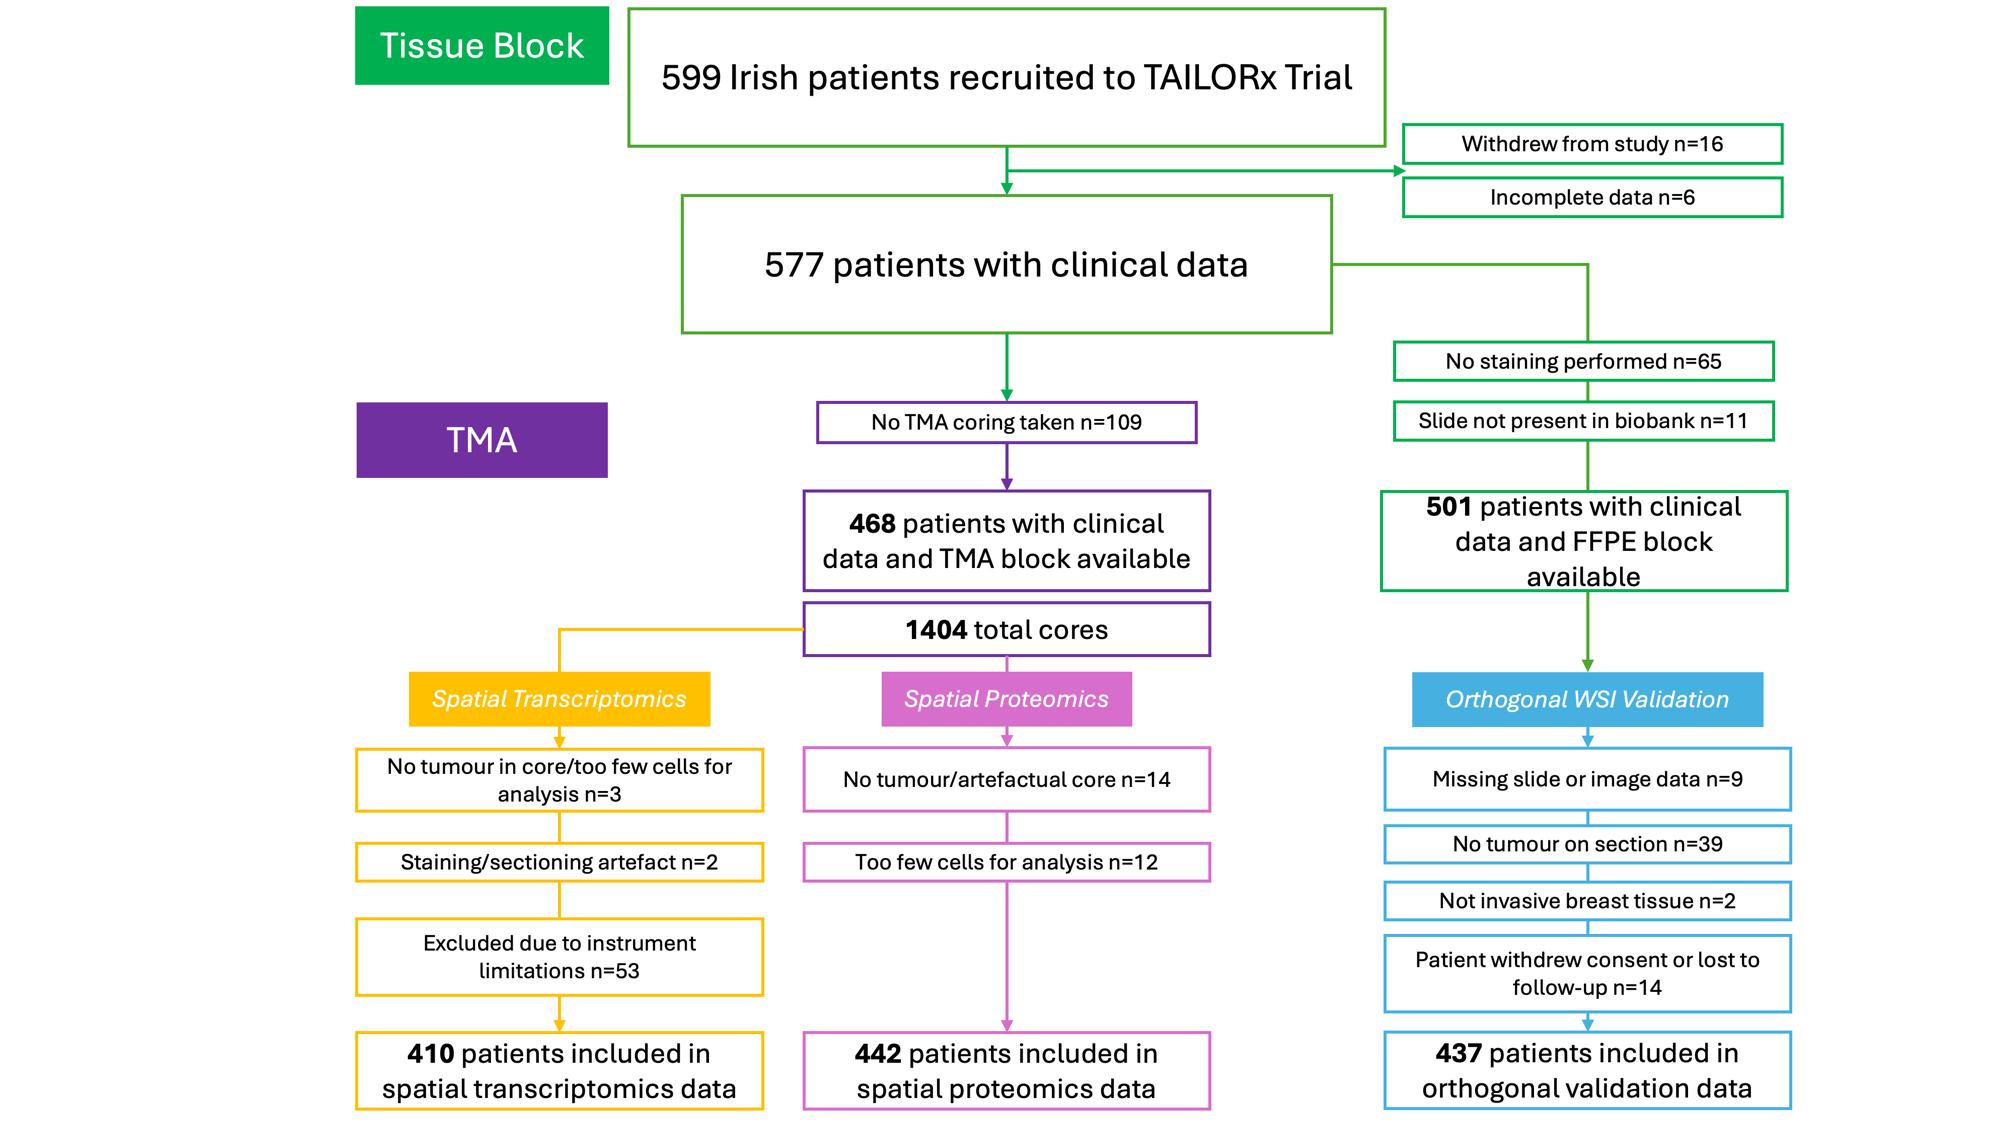
**- Supplementary Figures -**

**Figure S1.** CONSORT diagram of Irish patients previously enrolled on the TAILORx clinical trial, split for spatial transcriptomics, spatial proteomics, and orthogonal WSI validation analyses. **N.B.** Spatial transcriptomics instrument limitations allude to the restricted aspiration area of the Nanostring GeoMx DSP, as this was too small to accommodate all 8 rows of 12 TMA cores.


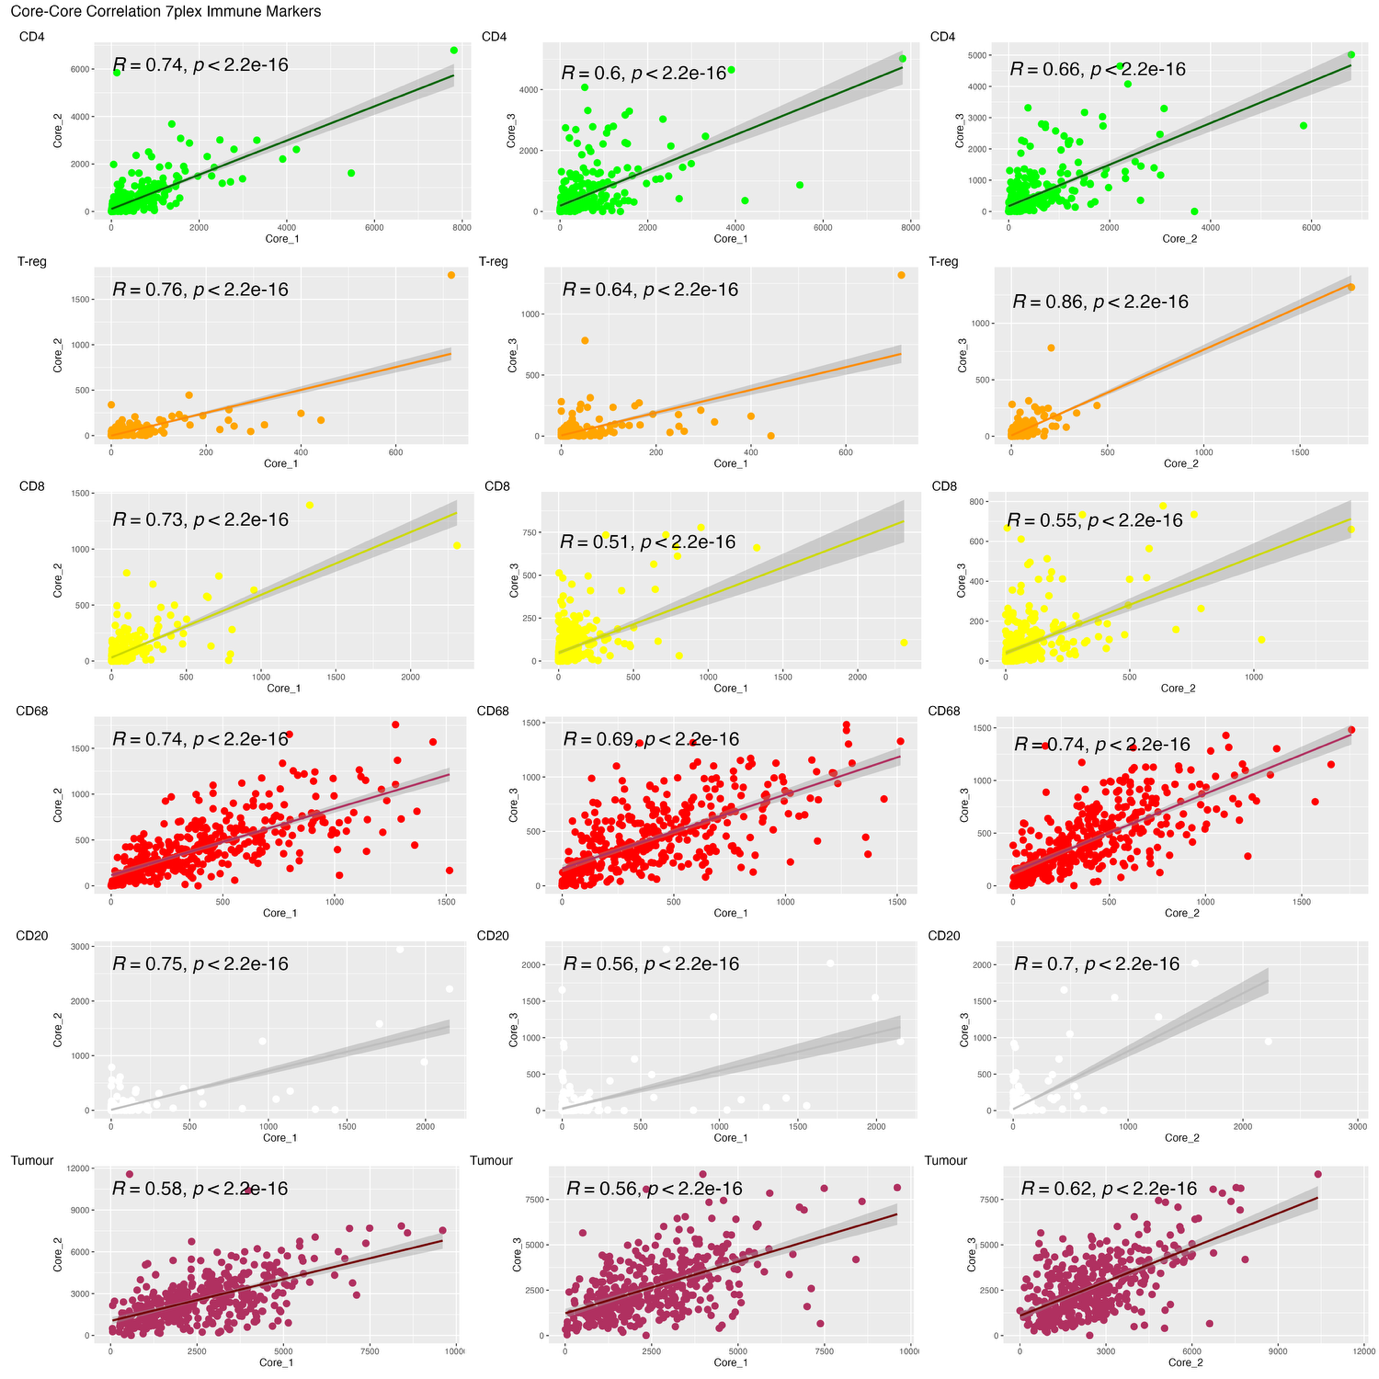


**Figure S2.** Core-core correlation for objects detected by spatial proteomics workflow. R = Pearsons correlation coefficient.

**
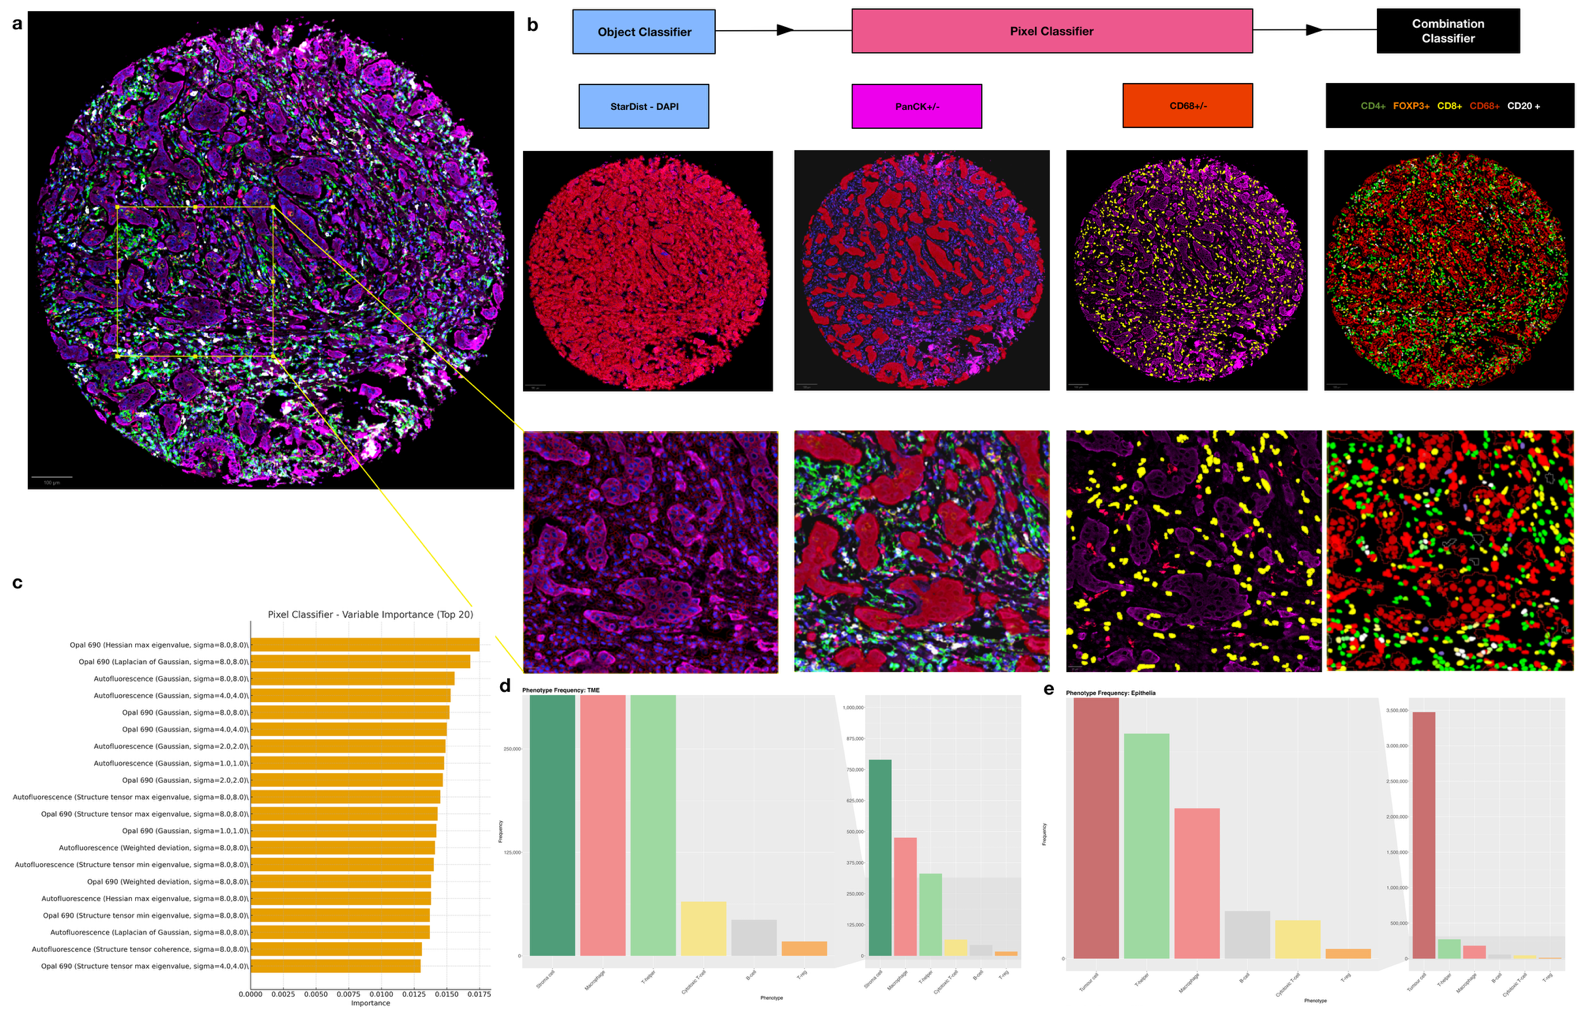
Figure S3.** Digital pathology workflow for multiplexed immunofluorescence data. **A.** Illustrative example of a representative TMA core and region of interest (ROI: yellow). **B.** Classifier generation workflow, with example outputs at the core level (middle row) and ROI level (bottom row). **C.** Variable importance for the pixel classifier. **D.-E.** Barcharts of detected phenotype frequencies within all cores. Left plot shows a zoom in to the y-axis. For **D.** Tumour Microenvironment (i.e. Stroma). **E.** Tumour epithelia (i.e. tumour).

**
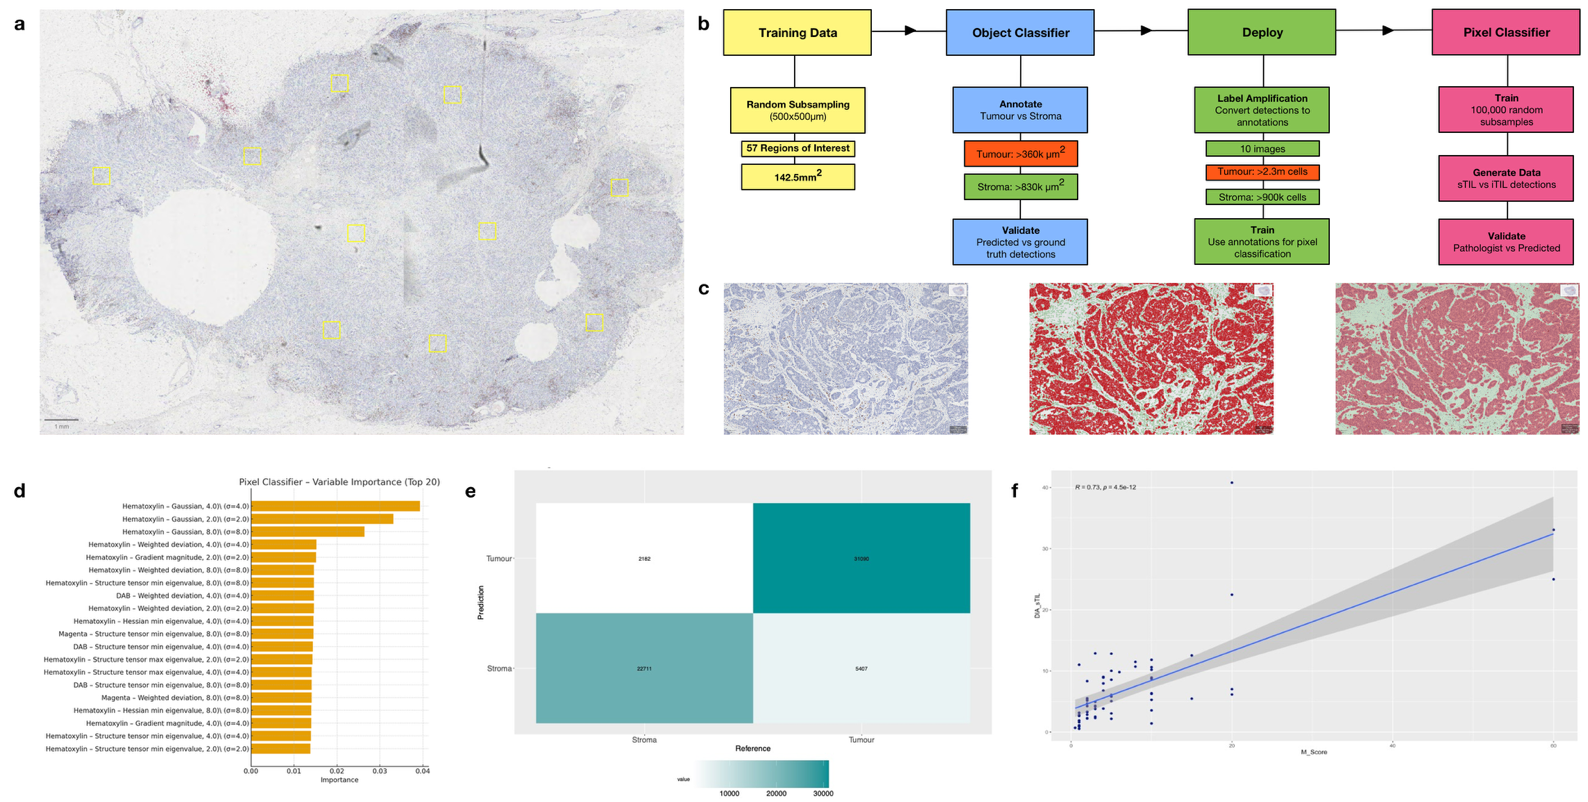
**

**Figure S4.** Digital pathology workflow for orthogonal CD8 Immunohistochemistry. **A.** Illustrative example of a representative whole slide image (WSI) and regions of interest (ROI: yellow). **B.** Classifier generation workflow. Briefly, an object detection classifier was trained to generate tumour vs stroma detections. These were then used as annotations for generation of a pixel classifier for the same classes. **C.** Illustrative examples of object detection and pixel classification in an ROI**. D.** Variable importance for the pixel classifier. **E.** Confusion matrix for the generated object detection classifier. **F.** Correlation plot of stromal CD8 percentage versus pathologist ground truth in a hold-out validation set of n=68 WSIs.

**
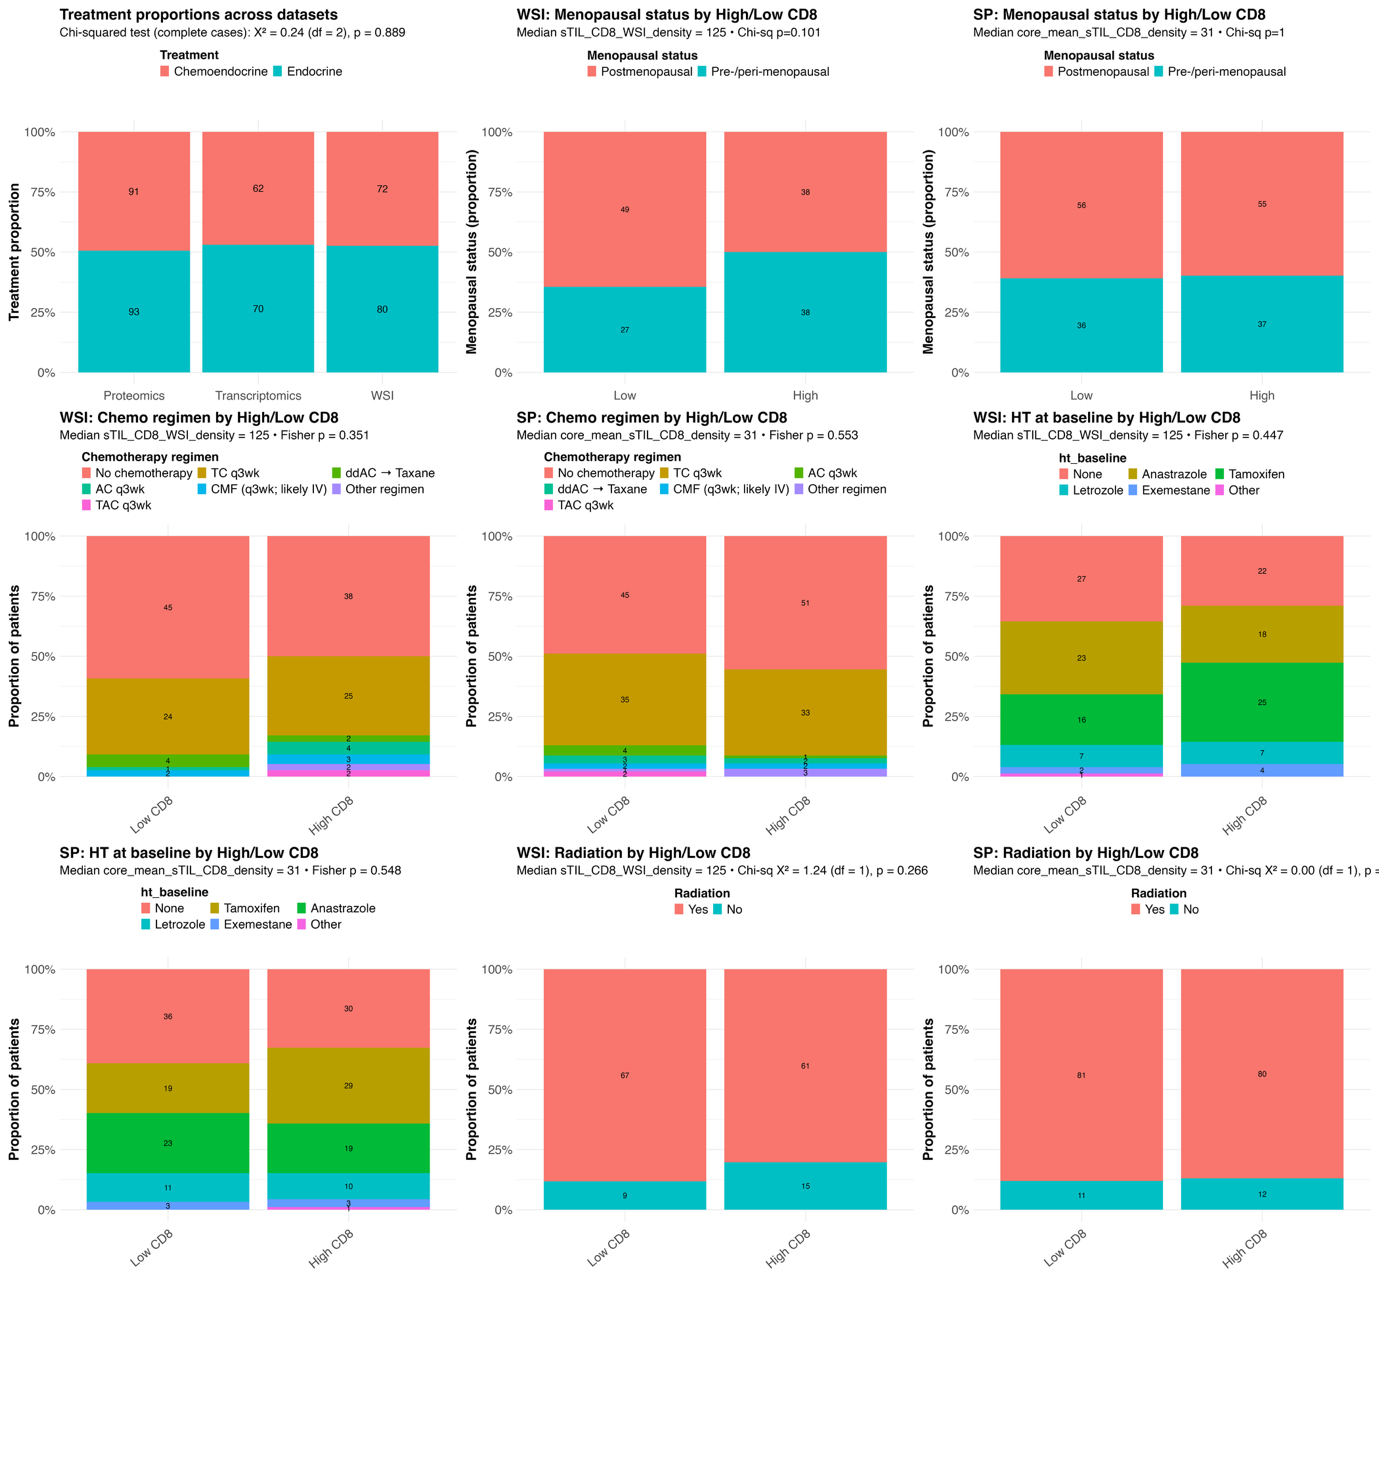
**

**Figure S5.** Drop-out and missing comparison using Chi-squared and Fishers-exact tests (categorical, two-sided) or Wilcoxon rank-sum (continuous, two-sided), across datasets for the Intermediate Oncotype Dx RS (RS16-25). **A.** Received adjuvant treatment acrossspatial omics datasets. **B.-C.** Groups of menopausal status across high vs low CD8 density, for **B.** WSIs, **C.** Spatial proteomics. **D.-E.** Groups of received adjuvant chemotherapy regimen across high vs low CD8 density, for **D.** WSIs, **E.** Spatial proteomics. **F.-G.** Groups of received adjuvant hormone therapy regimen across high vs low CD8 density, for **F.** WSIs, **G.** Spatial proteomics. **H.-I.** Groups of received radiotherapy across high vs low CD8 density, for **H.** WSIs. **I.** Spatial proteomics.

**
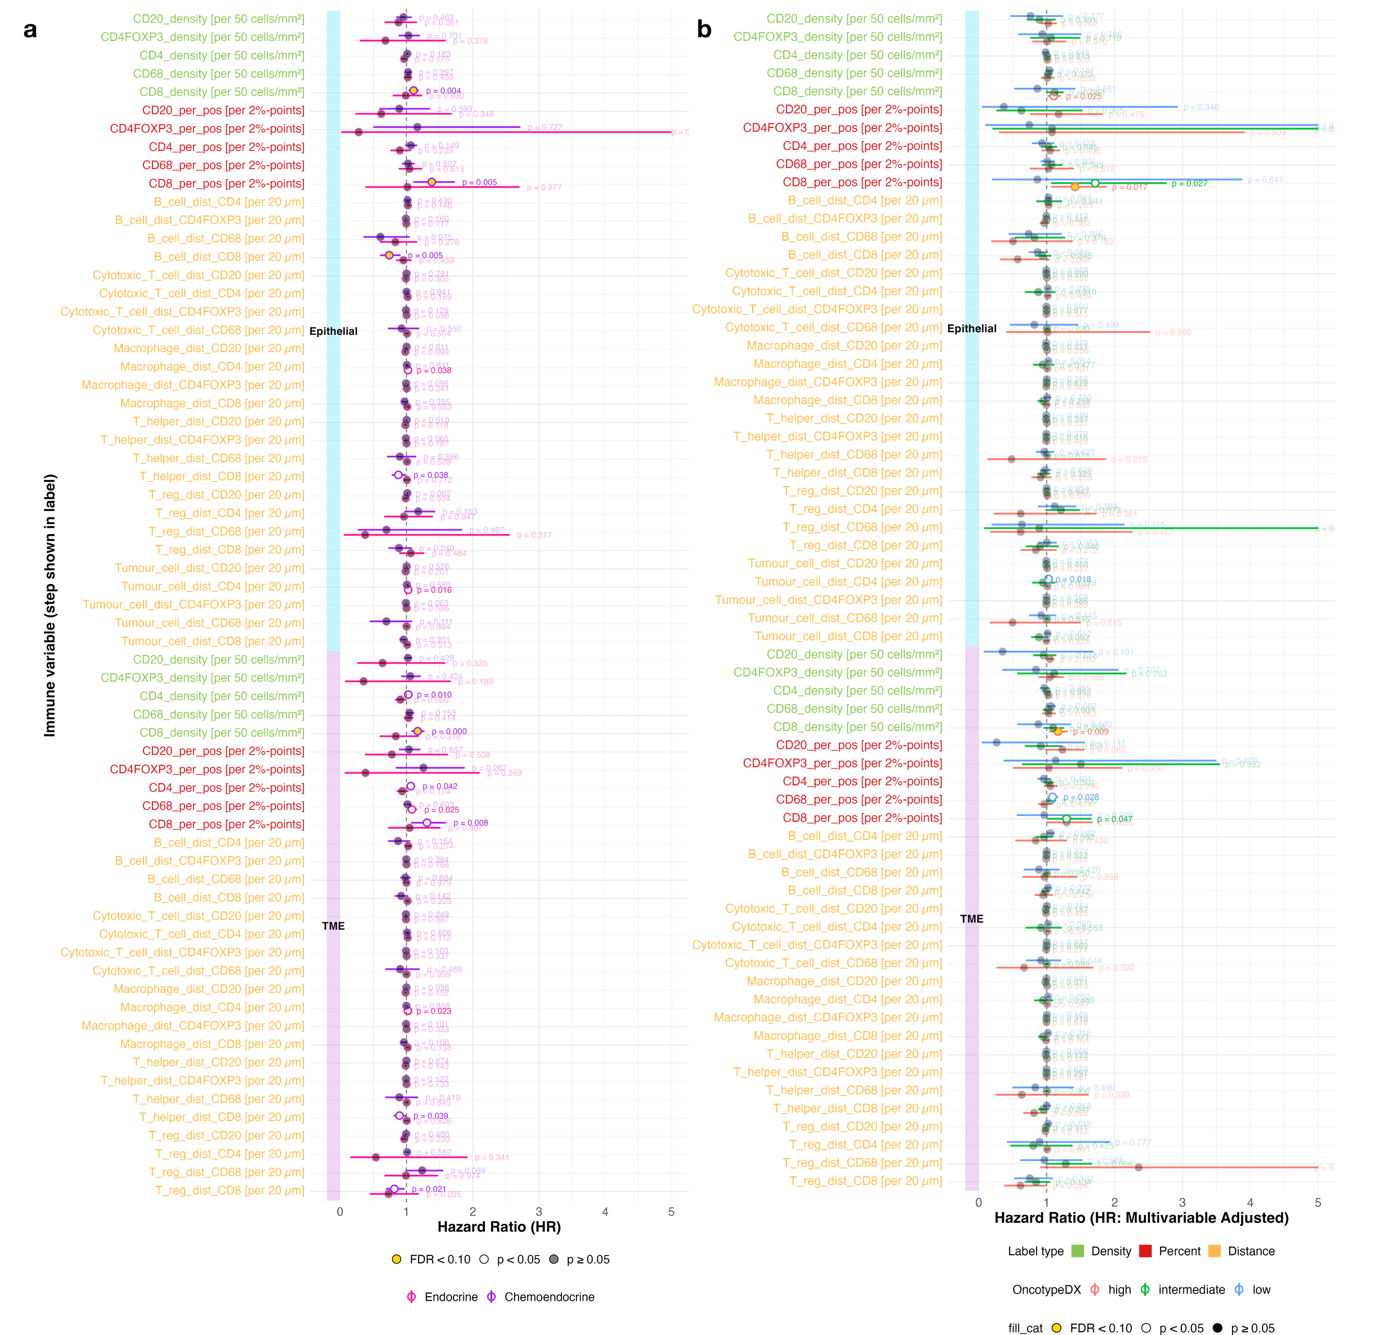
**

**Figure S6.** Multivariable Cox regression forest plots for a predictor density (green), percent (red), or distance/proximity (yellow) immune variable, adjusted for all clinical covariates (menopausal status, patient age, histological grade, primary tumour size, luminal subtype). **A.** Whole cohort split by received adjuvant treatment. **B.** Individual Oncotype Dx RS categories. p-values show significance, point fill shows FDR-adjusted significance.

**
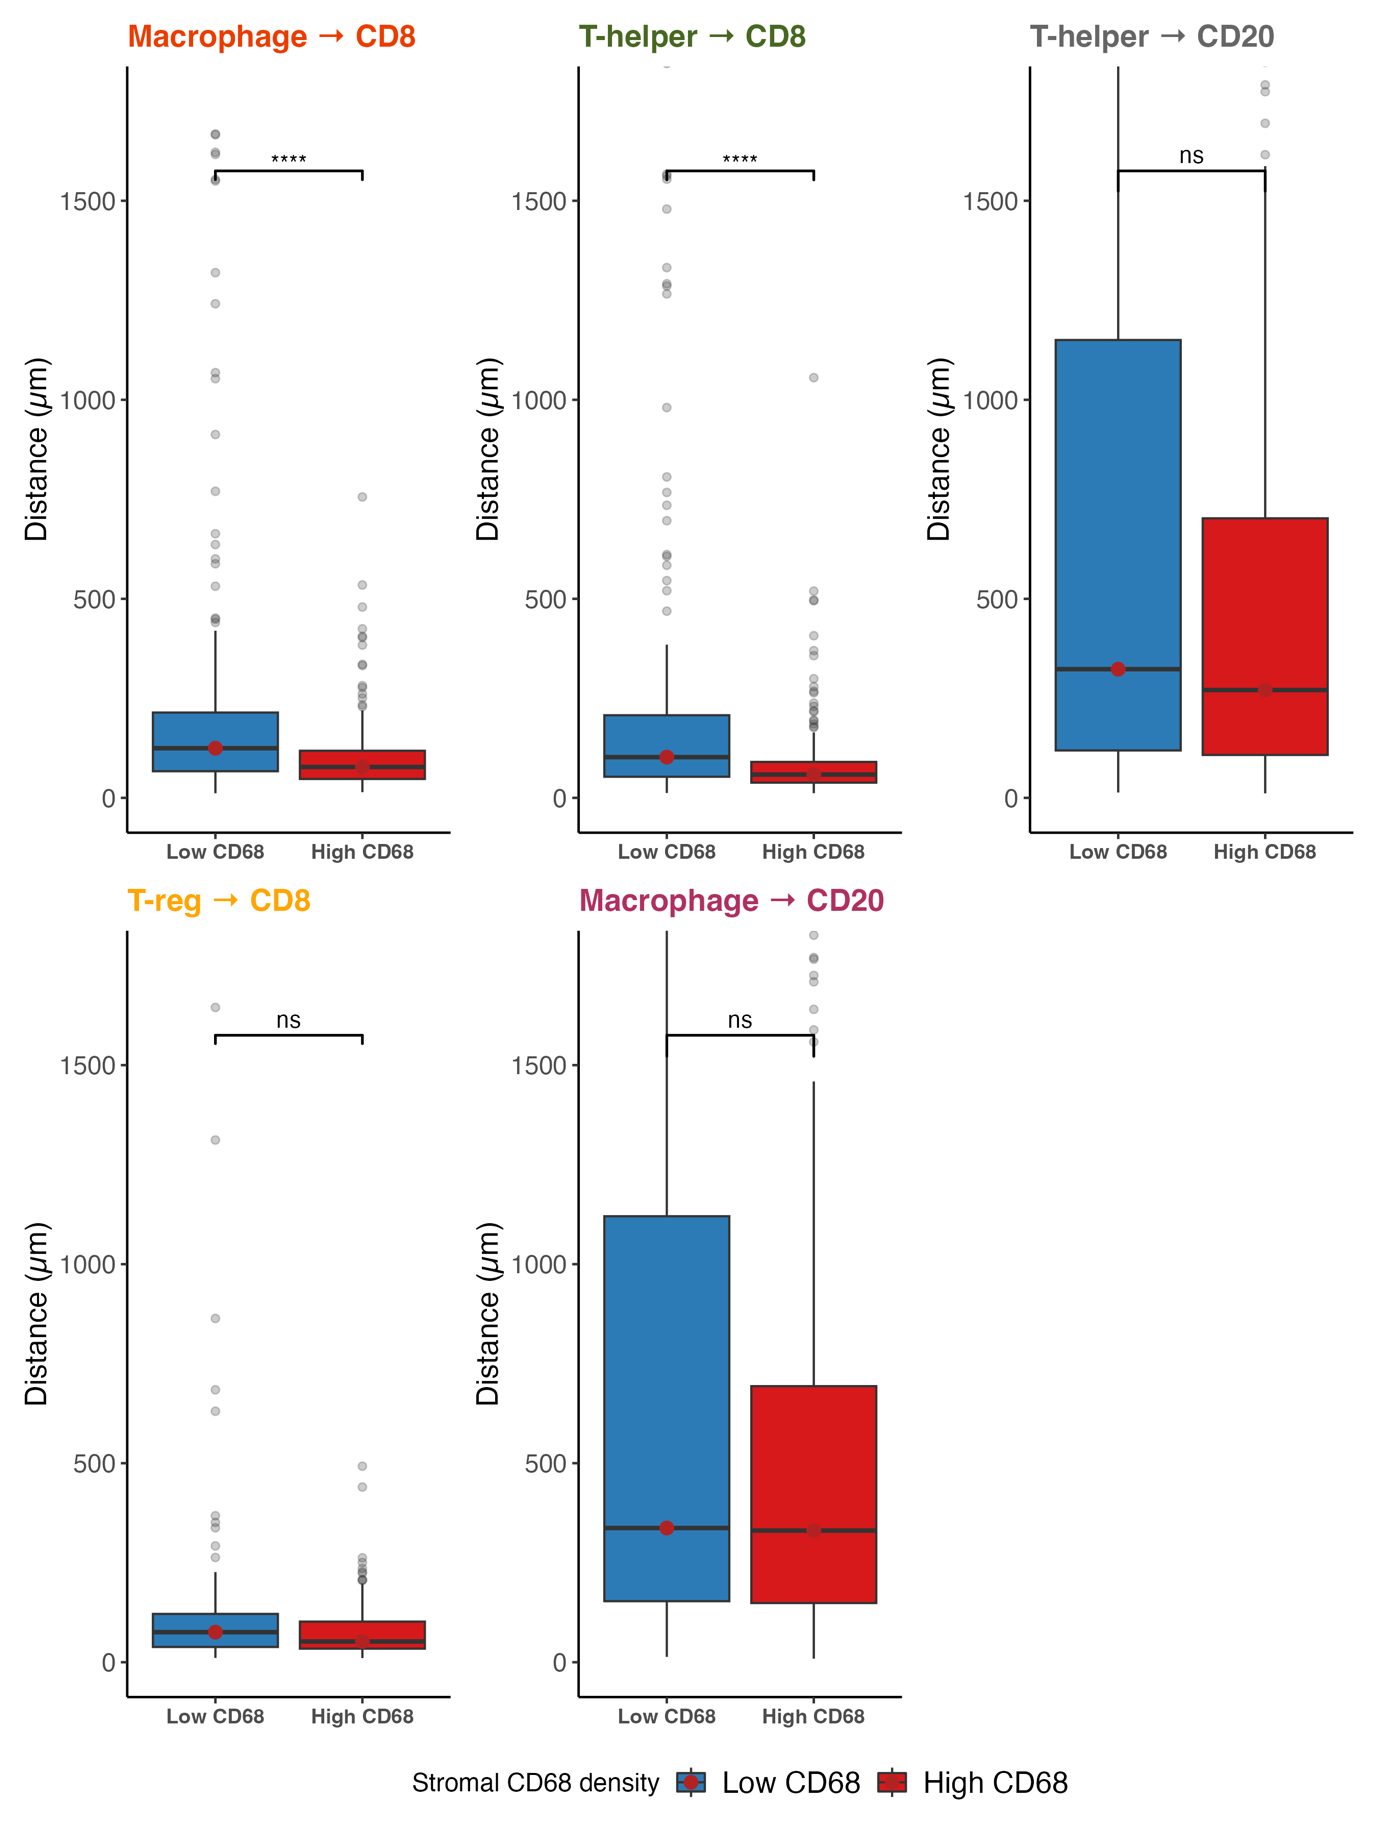
**

**Figure S7.** Boxplots of key proximity variables across categories of high vs low stromal CD68 (macrophage) density. Asterisks show the p-value significance (see methods). Comparison of medians was performed using a two-sided Wilcoxon test.

***- Supplementary Tables -***

***Table S1.*** *Antibodies and Dyes used in 6-plex mIF Spatial Proteomics, Spatial Transcriptomics, and Orthogonal Validation Assessment of Cohort Tissue Microarray and Whole-Resection Samples*

| Antibody | Clonality, Species | Clone | Antigen Retrieval | Antibody Conc. | Fluorophore | Fluorophore Conc. | Linker Usage |
| --- | --- | --- | --- | --- | --- | --- | --- |
| CD4 | Monoclonal Rabbit | EP204 | pH9 | 1:140 | Opal 520 | 1:200 | Yes |
| CD8 | Monoclonal Mouse | C8/144B | pH9 | 1:450 | Opal 570 | 1:500 | Yes |
| FOXP3 | Monoclonal Rabbit | D608R | pH6 | 1:285 | Opal 620 | 1:75 | Yes |
| CD68 | Monoclonal Mouse | PG-M1 | pH6 | 1:100 | Opal 650 | 1:150 | No |
| Pan-Cytokeratin | Monoclonal Mouse | AE1/AE3 | pH6 | 1:500 | Opal 690 | 1:150 | No |
| CD20 | Monoclonal Mouse | L26 | pH6 | 1:280 | Opal 780 | 1:25 | No* |
| Pan-Cytokeratin1 | Monoclonal Mouse | AE1+AE3 | pH9 | - | AF 532 | - | No |
| CD451 | Monoclonal Mouse | 2B11+PD7/26 | pH9 | - | AF 594 | - | No |
| SYTO131 | - | - | pH9 | - | AF 647 | - | No |
| CD8! | Monoclonal Mouse | C8/144B | pH9 | Proprietary | - | - | - |

* *Opal TSA-DIG:*

*1 Antibodies-dyes used for morphology marking, Nanostring GeoMx.*

*! Antibody used for orthogonal validation on whole-resection specimens.*

**Table S2**. Marker score derived from spatial proteomics data (TMA and WSI), across patient samples overall, and within epithelial (iTIL) and TME (sTIL) segments.

| *Median percentage (%)* | | | | | | |
| --- | --- | --- | --- | --- | --- | --- |
| Marker | Overall | Overall  IQR  (Q1-Q3) | Stroma | Stroma IQR  (Q1-Q3) | Epithelia | Epithelia IQR  (Q1-Q3) |
| CD4+ | 3.59 | 1.1 – 8.5 | 6.67 | 2.2 – 13.3 | 1.40 | 0.4 – 4.4 |
| CD4+FOXP3+ | 0.05 | 0 – 0.3 | 0.10 | 0 – 0.5 | 0.009 | 0 – 0.08 |
| CD8+ | 0.71 | 0.3 – 1.6 | 1.48 | 0.5 – 2.9 | 0.25 | 0 – 0.7 |
| CD68+ | 6.93 | 3.2 – 10.5 | 12.70 | 5.9 – 19.5 | 3.36 | 1.2 – 6.3 |
| CD20+ | 0.10 | 0 – 0.4 | 0.10 | 0 – 0.5 | 0.06 | 0 – 0.3 |
| CD8WSI | 2.78 | 1.4-4.4 | 4.24 | 2.2-7.6 | 0.84 | 0.4-1.8 |
| *Median density (cells/mm2)* | | | | | | |
| CD4+ | 130.2 | 41.1 – 368.3 | 122.7 | 37.8 - 310 | 126.4 | 33.2 – 379.2 |
| CD4+FOXP3+ | 1.9 | 0 – 11.3 | 1.6 | 0 – 11.6 | 0.8 | 0 – 7.2 |
| CD8+ | 28.2 | 10.1 – 68.8 | 27.0 | 9.3 – 75.8 | 22.3 | 7.5 – 62.1 |
| CD68+ | 301.4 | 130.4 – 469.4 | 272.6 | 115.6 – 439.9 | 295.5 | 108.6 – 556.7 |
| CD20+ | 3.7 | 0.8 – 17.0 | 1.8 | 0 – 10.9 | 4.8 | 0 – 22.8 |
| CD8WSI | 226.0 | 117-423.0 | 125.0 | 65-246.0 | 74.3 | 35.4-163.9 |

**Table S4**. Cell detection parameters used for StarDist plugin for detection of DAPI+ cells in multiplexed immunofluorescence images in QuPath.

| *Cell detection parameters - mIF* | |
| --- | --- |
| Parameter | **Value** |
| Model | dsb2018_heavy_augment.pb |
| Channels | DAPI |
| Normalise Percentiles | 10, 99 |
| Threshold | 0.45 |
| Pixel Size | 0.499 |
| Cell Expansion | 5.0μm |
| Measure Shape | TRUE |
| Measure Intensity | TRUE |
| Include Probability | TRUE |
| Contrain to Parent | FALSE |

**Table S5**. Cell detection parameters used for orthogonal validation of CD8 immunohistochemistry on whole-slide images in QuPath.

| *Cell detection parameters - WSI* | |
| --- | --- |
| Parameter | **Value** |
| Detection Image | Optical density sum |
| Requested pixel size | 0.15μm |
| Background Radius | 4μm  (opening by reconstruction TRUE) |
| Median Filter Radius | 1μm |
| Sigma | 1μm |
| Minimum Area | 10μm2 |
| Maximum Area | 400μm2 |
| Threshold | 0.07 |
| Max Background Density | 4  (split by shape TRUE; Exclude DAB FALSE) |
| Cell Expansion | 1.3μm  (include cell nucleus FALSE; sooth boundaries TRUE; make measurements TRUE) |

**Table S6**. TME immune variable (sTIL) Proportional Hazard (PH) checks across strata of received adjuvant therapy.

| Covariate | rho | Chi-square | df | *p* | Global Chi-square | Global *p* |
| --- | --- | --- | --- | --- | --- | --- |
| Chemoendocrine | | | | | | |
| B_cell_dist_CD4 [per 20 µm] | −0.043 | 0.170 | 1 | 0.680 | 8.240 | 0.221 |
| B_cell_dist_CD4FOXP3 [per 20 µm] | 0.009 | 0.070 | 1 | 0.791 | 8.989 | 0.174 |
| B_cell_dist_CD68 [per 20 µm] | 0.167 | 0.108 | 1 | 0.742 | 9.175 | 0.164 |
| B_cell_dist_CD8 [per 20 µm] | −0.144 | 1.644 | 1 | 0.200 | 9.341 | 0.155 |
| CD20_density [per 50 cells/mm²] | 0.017 | 0.172 | 1 | 0.679 | 8.188 | 0.225 |
| CD20_per_pos [per 2%-points] | −0.066 | 0.003 | 1 | 0.959 | 8.324 | 0.215 |
| CD4FOXP3_density [per 50 cells/mm²] | −0.023 | 0.041 | 1 | 0.839 | 8.266 | 0.219 |
| CD4FOXP3_per_pos [per 2%-points] | 0.057 | 0.008 | 1 | 0.929 | 8.272 | 0.219 |
| CD4_density [per 50 cells/mm²] | −0.009 | 0.009 | 1 | 0.926 | 8.523 | 0.202 |
| CD4_per_pos [per 2%-points] | 0.077 | 0.531 | 1 | 0.466 | 9.067 | 0.170 |
| CD68_density [per 50 cells/mm²] | −0.134 | 1.461 | 1 | 0.227 | 8.682 | 0.192 |
| CD68_per_pos [per 2%-points] | −0.141 | 1.076 | 1 | 0.299 | 8.767 | 0.187 |
| CD8_density [per 50 cells/mm²] | 0.056 | 0.749 | 1 | 0.387 | 8.882 | 0.180 |
| CD8_per_pos [per 2%-points] | −0.040 | 0.043 | 1 | 0.835 | 8.266 | 0.219 |
| Cytotoxic_T_cell_dist_CD20 [per 20 µm] | 0.036 | 0.087 | 1 | 0.768 | 7.623 | 0.267 |
| Cytotoxic_T_cell_dist_CD4 [per 20 µm] | −0.043 | 0.334 | 1 | 0.563 | 7.638 | 0.266 |
| Cytotoxic_T_cell_dist_CD4FOXP3 [per 20 µm] | −0.042 | 0.036 | 1 | 0.850 | 7.200 | 0.303 |
| Cytotoxic_T_cell_dist_CD68 [per 20 µm] | 0.234 | 2.206 | 1 | 0.137 | 9.565 | 0.144 |
| Macrophage_dist_CD20 [per 20 µm] | 0.084 | 0.477 | 1 | 0.490 | 9.199 | 0.163 |
| Macrophage_dist_CD4 [per 20 µm] | −0.184 | 1.968 | 1 | 0.161 | 10.351 | 0.111 |
| Macrophage_dist_CD4FOXP3 [per 20 µm] | −0.025 | 0.008 | 1 | 0.928 | 8.406 | 0.210 |
| Macrophage_dist_CD8 [per 20 µm] | −0.161 | 2.365 | 1 | 0.124 | 10.268 | 0.114 |
| T_helper_dist_CD20 [per 20 µm] | 0.123 | 1.087 | 1 | 0.297 | 7.657 | 0.264 |
| T_helper_dist_CD4FOXP3 [per 20 µm] | 0.005 | 0.031 | 1 | 0.861 | 6.491 | 0.370 |
| T_helper_dist_CD68 [per 20 µm] | 0.214 | 2.515 | 1 | 0.113 | 8.917 | 0.178 |
| T_helper_dist_CD8 [per 20 µm] | 0.161 | 0.421 | 1 | 0.516 | 7.210 | 0.302 |
| T_reg_dist_CD20 [per 20 µm] | 0.149 | 1.371 | 1 | 0.242 | 7.583 | 0.270 |
| T_reg_dist_CD4 [per 20 µm] | −0.026 | 0.215 | 1 | 0.643 | 6.691 | 0.350 |
| T_reg_dist_CD68 [per 20 µm] | 0.282 | 1.905 | 1 | 0.168 | 7.793 | 0.254 |
| T_reg_dist_CD8 [per 20 µm] | 0.114 | 0.059 | 1 | 0.808 | 6.650 | 0.354 |
| Endocrine | | | | | | |
| B_cell_dist_CD4 [per 20 µm] | −0.120 | 0.125 | 1 | 0.723 | 3.044 | 0.803 |
| B_cell_dist_CD68 [per 20 µm] | 0.149 | 0.034 | 1 | 0.853 | 2.879 | 0.824 |
| CD20_density [per 50 cells/mm²] | −0.318 | 3.196 | 1 | 0.074 | 7.232 | 0.300 |
| CD20_per_pos [per 2%-points] | −0.314 | 4.411 | 1 | 0.036 | 8.314 | 0.216 |
| CD4FOXP3_density [per 50 cells/mm²] | −0.346 | 4.824 | 1 | 0.028 | 9.295 | 0.158 |
| CD4FOXP3_per_pos [per 2%-points] | −0.367 | 5.559 | 1 | 0.018 | 9.710 | 0.137 |
| CD4_density [per 50 cells/mm²] | −0.040 | 0.014 | 1 | 0.906 | 4.498 | 0.610 |
| CD4_per_pos [per 2%-points] | 0.120 | 0.474 | 1 | 0.491 | 5.061 | 0.536 |
| CD68_density [per 50 cells/mm²] | −0.288 | 1.687 | 1 | 0.194 | 6.599 | 0.360 |
| CD68_per_pos [per 2%-points] | −0.117 | 0.445 | 1 | 0.505 | 5.169 | 0.522 |
| CD8_density [per 50 cells/mm²] | −0.351 | 3.766 | 1 | 0.052 | 9.142 | 0.166 |
| CD8_per_pos [per 2%-points] | −0.271 | 3.361 | 1 | 0.067 | 8.484 | 0.205 |
| T_helper_dist_CD8 [per 20 µm] | 0.060 | 0.006 | 1 | 0.936 | 3.043 | 0.803 |
| T_reg_dist_CD20 [per 20 µm] | −0.111 | 0.007 | 1 | 0.932 | 3.926 | 0.687 |
| T_reg_dist_CD4 [per 20 µm] | −0.608 | 0.355 | 1 | 0.552 | 4.535 | 0.605 |
| T_reg_dist_CD68 [per 20 µm] | 0.471 | 0.328 | 1 | 0.567 | 3.880 | 0.693 |
| T_reg_dist_CD8 [per 20 µm] | 0.143 | 0.037 | 1 | 0.848 | 4.089 | 0.665 |
|  | | | | | | |

**Table S7**. Epithelial immune variable (iTIL) Proportional Hazard (PH) checks across strata of received adjuvant therapy.

| Covariate | rho | Chi-square | df | *p* | Global Chi-square | Global *p* |
| --- | --- | --- | --- | --- | --- | --- |
| Chemoendocrine | | | | | | |
| B_cell_dist_CD68 [per 20 µm] | 0.108 | 0.021 | 1 | 0.885 | 3.377 | 0.760 |
| B_cell_dist_CD8 [per 20 µm] | 0.189 | 0.187 | 1 | 0.665 | 3.136 | 0.792 |
| CD20_density [per 50 cells/mm²] | −0.011 | 0.039 | 1 | 0.844 | 8.024 | 0.236 |
| CD20_per_pos [per 2%-points] | 0.004 | 0.066 | 1 | 0.797 | 8.042 | 0.235 |
| CD4FOXP3_density [per 50 cells/mm²] | −0.007 | 0.000 | 1 | 0.997 | 8.235 | 0.221 |
| CD4FOXP3_per_pos [per 2%-points] | −0.018 | 0.012 | 1 | 0.912 | 8.221 | 0.222 |
| CD4_density [per 50 cells/mm²] | 0.060 | 0.121 | 1 | 0.728 | 8.649 | 0.194 |
| CD4_per_pos [per 2%-points] | 0.111 | 0.454 | 1 | 0.501 | 9.231 | 0.161 |
| CD68_density [per 50 cells/mm²] | −0.091 | 0.269 | 1 | 0.604 | 8.216 | 0.223 |
| CD68_per_pos [per 2%-points] | −0.034 | 0.030 | 1 | 0.863 | 8.151 | 0.227 |
| CD8_density [per 50 cells/mm²] | 0.005 | 0.098 | 1 | 0.754 | 8.457 | 0.207 |
| CD8_per_pos [per 2%-points] | 0.002 | 0.105 | 1 | 0.746 | 8.363 | 0.213 |
| Cytotoxic_T_cell_dist_CD20 [per 20 µm] | 0.131 | 0.631 | 1 | 0.427 | 6.877 | 0.332 |
| Cytotoxic_T_cell_dist_CD4 [per 20 µm] | −0.153 | 0.565 | 1 | 0.452 | 6.624 | 0.357 |
| Cytotoxic_T_cell_dist_CD4FOXP3 [per 20 µm] | 0.089 | 0.481 | 1 | 0.488 | 5.813 | 0.444 |
| Cytotoxic_T_cell_dist_CD68 [per 20 µm] | 0.283 | 1.711 | 1 | 0.191 | 7.399 | 0.286 |
| Macrophage_dist_CD20 [per 20 µm] | 0.080 | 0.456 | 1 | 0.500 | 7.937 | 0.243 |
| Macrophage_dist_CD4 [per 20 µm] | −0.238 | 1.390 | 1 | 0.238 | 9.137 | 0.166 |
| Macrophage_dist_CD4FOXP3 [per 20 µm] | 0.061 | 0.261 | 1 | 0.609 | 7.031 | 0.318 |
| Macrophage_dist_CD8 [per 20 µm] | −0.125 | 1.375 | 1 | 0.241 | 8.184 | 0.225 |
| T_helper_dist_CD20 [per 20 µm] | 0.144 | 0.988 | 1 | 0.320 | 6.473 | 0.372 |
| T_helper_dist_CD4FOXP3 [per 20 µm] | 0.066 | 0.326 | 1 | 0.568 | 4.985 | 0.546 |
| T_helper_dist_CD68 [per 20 µm] | 0.327 | 2.155 | 1 | 0.142 | 7.555 | 0.273 |
| T_helper_dist_CD8 [per 20 µm] | 0.076 | 0.056 | 1 | 0.812 | 5.291 | 0.507 |
| T_reg_dist_CD20 [per 20 µm] | 0.093 | 1.520 | 1 | 0.218 | 7.136 | 0.308 |
| T_reg_dist_CD4 [per 20 µm] | 0.023 | 0.007 | 1 | 0.932 | 6.025 | 0.420 |
| T_reg_dist_CD68 [per 20 µm] | 0.124 | 0.010 | 1 | 0.921 | 7.522 | 0.275 |
| T_reg_dist_CD8 [per 20 µm] | −0.066 | 0.023 | 1 | 0.881 | 7.423 | 0.283 |
| Tumour_cell_dist_CD20 [per 20 µm] | 0.081 | 0.312 | 1 | 0.576 | 7.683 | 0.262 |
| Tumour_cell_dist_CD4 [per 20 µm] | −0.212 | 1.242 | 1 | 0.265 | 8.663 | 0.193 |
| Tumour_cell_dist_CD4FOXP3 [per 20 µm] | 0.039 | 0.182 | 1 | 0.669 | 6.715 | 0.348 |
| Tumour_cell_dist_CD68 [per 20 µm] | 0.279 | 1.996 | 1 | 0.158 | 8.779 | 0.186 |
| Tumour_cell_dist_CD8 [per 20 µm] | −0.143 | 2.879 | 1 | 0.090 | 8.752 | 0.188 |
| Endocrine | | | | | | |
| B_cell_dist_CD68 [per 20 µm] | 0.244 | 0.340 | 1 | 0.560 | 1.488 | 0.960 |
| B_cell_dist_CD8 [per 20 µm] | −0.339 | 0.827 | 1 | 0.363 | 3.437 | 0.752 |
| CD20_density [per 50 cells/mm²] | −0.315 | 1.015 | 1 | 0.314 | 5.177 | 0.521 |
| CD20_per_pos [per 2%-points] | −0.350 | 1.646 | 1 | 0.199 | 5.683 | 0.460 |
| CD4FOXP3_density [per 50 cells/mm²] | −0.258 | 2.223 | 1 | 0.136 | 6.580 | 0.361 |
| CD4FOXP3_per_pos [per 2%-points] | −0.246 | 2.383 | 1 | 0.123 | 6.696 | 0.350 |
| CD4_density [per 50 cells/mm²] | 0.095 | 0.248 | 1 | 0.618 | 4.667 | 0.587 |
| CD4_per_pos [per 2%-points] | 0.075 | 0.159 | 1 | 0.690 | 4.614 | 0.594 |
| CD68_density [per 50 cells/mm²] | −0.276 | 2.291 | 1 | 0.130 | 7.662 | 0.264 |
| CD68_per_pos [per 2%-points] | −0.214 | 1.208 | 1 | 0.272 | 5.909 | 0.433 |
| CD8_density [per 50 cells/mm²] | −0.117 | 0.441 | 1 | 0.507 | 4.970 | 0.548 |
| CD8_per_pos [per 2%-points] | −0.099 | 0.286 | 1 | 0.593 | 4.767 | 0.574 |
| Cytotoxic_T_cell_dist_CD68 [per 20 µm] | 0.014 | 0.017 | 1 | 0.898 | 3.295 | 0.771 |
| Macrophage_dist_CD8 [per 20 µm] | −0.189 | 0.056 | 1 | 0.812 | 4.132 | 0.659 |
| T_helper_dist_CD8 [per 20 µm] | −0.159 | 0.123 | 1 | 0.726 | 3.783 | 0.706 |
| T_reg_dist_CD20 [per 20 µm] | −0.087 | 0.001 | 1 | 0.978 | 5.049 | 0.537 |
| T_reg_dist_CD4 [per 20 µm] | −0.255 | 0.272 | 1 | 0.602 | 4.976 | 0.547 |
| T_reg_dist_CD68 [per 20 µm] | 0.601 | 1.775 | 1 | 0.183 | 6.199 | 0.401 |
| T_reg_dist_CD8 [per 20 µm] | 0.194 | 0.569 | 1 | 0.450 | 4.486 | 0.611 |
| Tumour_cell_dist_CD8 [per 20 µm] | −0.082 | 0.001 | 1 | 0.973 | 3.758 | 0.709 |
|  | | | | | | |

| Table S8. TME immune variable (sTIL) Proportional Hazard (PH) checks across strata of Oncotype Dx RS categories. | | | | | | |
| --- | --- | --- | --- | --- | --- | --- |
| Covariate | **rho** | **Chi-square** | **df** | ***p*** | **Global Chi-square** | **Global *p*** |
| High RS | | | | | | |
| B_cell_dist_CD4 [per 20 µm] | −0.512 | 2.184 | 1 | 0.139 | 5.639 | 0.465 |
| B_cell_dist_CD4 [per 20 µm] | −0.512 | 2.184 | 1 | 0.139 | 5.639 | 0.465 |
| B_cell_dist_CD4 [per 20 µm] | −0.512 | 2.184 | 1 | 0.139 | 5.639 | 0.465 |
| B_cell_dist_CD68 [per 20 µm] | −0.365 | 3.844 | 1 | 0.050 | 5.531 | 0.478 |
| B_cell_dist_CD68 [per 20 µm] | −0.365 | 3.844 | 1 | 0.050 | 5.531 | 0.478 |
| B_cell_dist_CD68 [per 20 µm] | −0.365 | 3.844 | 1 | 0.050 | 5.531 | 0.478 |
| CD20_per_pos [per 2%-points] | −0.070 | 0.096 | 1 | 0.757 | 8.156 | 0.227 |
| CD20_per_pos [per 2%-points] | −0.070 | 0.096 | 1 | 0.757 | 8.156 | 0.227 |
| CD20_per_pos [per 2%-points] | −0.070 | 0.096 | 1 | 0.757 | 8.156 | 0.227 |
| CD4FOXP3_per_pos [per 2%-points] | −0.205 | 0.129 | 1 | 0.720 | 9.093 | 0.168 |
| CD4FOXP3_per_pos [per 2%-points] | −0.205 | 0.129 | 1 | 0.720 | 9.093 | 0.168 |
| CD4FOXP3_per_pos [per 2%-points] | −0.205 | 0.129 | 1 | 0.720 | 9.093 | 0.168 |
| CD4_per_pos [per 2%-points] | −0.204 | 0.234 | 1 | 0.629 | 10.064 | 0.122 |
| CD4_per_pos [per 2%-points] | −0.204 | 0.234 | 1 | 0.629 | 10.064 | 0.122 |
| CD4_per_pos [per 2%-points] | −0.204 | 0.234 | 1 | 0.629 | 10.064 | 0.122 |
| CD68_per_pos [per 2%-points] | −0.322 | 0.211 | 1 | 0.646 | 8.853 | 0.182 |
| CD68_per_pos [per 2%-points] | −0.322 | 0.211 | 1 | 0.646 | 8.853 | 0.182 |
| CD68_per_pos [per 2%-points] | −0.322 | 0.211 | 1 | 0.646 | 8.853 | 0.182 |
| CD8_per_pos [per 2%-points] | 0.059 | 1.111 | 1 | 0.292 | 7.840 | 0.250 |
| CD8_per_pos [per 2%-points] | 0.059 | 1.111 | 1 | 0.292 | 7.840 | 0.250 |
| CD8_per_pos [per 2%-points] | 0.059 | 1.111 | 1 | 0.292 | 7.840 | 0.250 |
| Cytotoxic_T_cell_dist_CD68 [per 20 µm] | −0.210 | 1.629 | 1 | 0.202 | 10.097 | 0.121 |
| Cytotoxic_T_cell_dist_CD68 [per 20 µm] | −0.210 | 1.629 | 1 | 0.202 | 10.097 | 0.121 |
| Cytotoxic_T_cell_dist_CD68 [per 20 µm] | −0.210 | 1.629 | 1 | 0.202 | 10.097 | 0.121 |
| T_helper_dist_CD68 [per 20 µm] | −0.355 | 2.198 | 1 | 0.138 | 10.990 | 0.089 |
| T_helper_dist_CD68 [per 20 µm] | −0.355 | 2.198 | 1 | 0.138 | 10.990 | 0.089 |
| T_helper_dist_CD68 [per 20 µm] | −0.355 | 2.198 | 1 | 0.138 | 10.990 | 0.089 |
| T_reg_dist_CD68 [per 20 µm] | 0.029 | 1.831 | 1 | 0.176 | 7.886 | 0.247 |
| T_reg_dist_CD68 [per 20 µm] | 0.029 | 1.831 | 1 | 0.176 | 7.886 | 0.247 |
| T_reg_dist_CD68 [per 20 µm] | 0.029 | 1.831 | 1 | 0.176 | 7.886 | 0.247 |
| T_reg_dist_CD8 [per 20 µm] | 0.030 | 0.016 | 1 | 0.899 | 5.979 | 0.426 |
| T_reg_dist_CD8 [per 20 µm] | 0.030 | 0.016 | 1 | 0.899 | 5.979 | 0.426 |
| T_reg_dist_CD8 [per 20 µm] | 0.030 | 0.016 | 1 | 0.899 | 5.979 | 0.426 |
| Intermediate RS | | | | | | |
| B_cell_dist_CD4 [per 20 µm] | −0.152 | 0.219 | 1 | 0.640 | 1.135 | 0.980 |
| B_cell_dist_CD4 [per 20 µm] | −0.152 | 0.219 | 1 | 0.640 | 1.135 | 0.980 |
| B_cell_dist_CD4 [per 20 µm] | −0.152 | 0.219 | 1 | 0.640 | 1.135 | 0.980 |
| B_cell_dist_CD4FOXP3 [per 20 µm] | 0.032 | 0.062 | 1 | 0.803 | 1.082 | 0.982 |
| B_cell_dist_CD4FOXP3 [per 20 µm] | 0.032 | 0.062 | 1 | 0.803 | 1.082 | 0.982 |
| B_cell_dist_CD4FOXP3 [per 20 µm] | 0.032 | 0.062 | 1 | 0.803 | 1.082 | 0.982 |
| B_cell_dist_CD68 [per 20 µm] | 0.101 | 0.055 | 1 | 0.815 | 1.054 | 0.983 |
| B_cell_dist_CD68 [per 20 µm] | 0.101 | 0.055 | 1 | 0.815 | 1.054 | 0.983 |
| B_cell_dist_CD68 [per 20 µm] | 0.101 | 0.055 | 1 | 0.815 | 1.054 | 0.983 |
| B_cell_dist_CD8 [per 20 µm] | 0.299 | 0.158 | 1 | 0.691 | 1.256 | 0.974 |
| B_cell_dist_CD8 [per 20 µm] | 0.299 | 0.158 | 1 | 0.691 | 1.256 | 0.974 |
| B_cell_dist_CD8 [per 20 µm] | 0.299 | 0.158 | 1 | 0.691 | 1.256 | 0.974 |
| CD20_density [per 50 cells/mm²] | −0.257 | 0.291 | 1 | 0.589 | 3.489 | 0.745 |
| CD20_density [per 50 cells/mm²] | −0.257 | 0.291 | 1 | 0.589 | 3.489 | 0.745 |
| CD20_density [per 50 cells/mm²] | −0.257 | 0.291 | 1 | 0.589 | 3.489 | 0.745 |
| CD20_per_pos [per 2%-points] | −0.375 | 0.962 | 1 | 0.327 | 4.325 | 0.633 |
| CD20_per_pos [per 2%-points] | −0.375 | 0.962 | 1 | 0.327 | 4.325 | 0.633 |
| CD20_per_pos [per 2%-points] | −0.375 | 0.962 | 1 | 0.327 | 4.325 | 0.633 |
| CD4FOXP3_density [per 50 cells/mm²] | −0.032 | 0.094 | 1 | 0.759 | 3.192 | 0.784 |
| CD4FOXP3_density [per 50 cells/mm²] | −0.032 | 0.094 | 1 | 0.759 | 3.192 | 0.784 |
| CD4FOXP3_density [per 50 cells/mm²] | −0.032 | 0.094 | 1 | 0.759 | 3.192 | 0.784 |
| CD4FOXP3_per_pos [per 2%-points] | −0.029 | 0.142 | 1 | 0.706 | 3.187 | 0.785 |
| CD4FOXP3_per_pos [per 2%-points] | −0.029 | 0.142 | 1 | 0.706 | 3.187 | 0.785 |
| CD4FOXP3_per_pos [per 2%-points] | −0.029 | 0.142 | 1 | 0.706 | 3.187 | 0.785 |
| CD4_density [per 50 cells/mm²] | 0.005 | 0.005 | 1 | 0.941 | 3.064 | 0.801 |
| CD4_density [per 50 cells/mm²] | 0.005 | 0.005 | 1 | 0.941 | 3.064 | 0.801 |
| CD4_density [per 50 cells/mm²] | 0.005 | 0.005 | 1 | 0.941 | 3.064 | 0.801 |
| CD4_per_pos [per 2%-points] | 0.148 | 0.860 | 1 | 0.354 | 3.788 | 0.705 |
| CD4_per_pos [per 2%-points] | 0.148 | 0.860 | 1 | 0.354 | 3.788 | 0.705 |
| CD4_per_pos [per 2%-points] | 0.148 | 0.860 | 1 | 0.354 | 3.788 | 0.705 |
| CD68_density [per 50 cells/mm²] | −0.359 | 2.490 | 1 | 0.115 | 6.135 | 0.408 |
| CD68_density [per 50 cells/mm²] | −0.359 | 2.490 | 1 | 0.115 | 6.135 | 0.408 |
| CD68_density [per 50 cells/mm²] | −0.359 | 2.490 | 1 | 0.115 | 6.135 | 0.408 |
| CD68_per_pos [per 2%-points] | −0.222 | 1.090 | 1 | 0.297 | 4.098 | 0.663 |
| CD68_per_pos [per 2%-points] | −0.222 | 1.090 | 1 | 0.297 | 4.098 | 0.663 |
| CD68_per_pos [per 2%-points] | −0.222 | 1.090 | 1 | 0.297 | 4.098 | 0.663 |
| CD8_density [per 50 cells/mm²] | −0.139 | 1.029 | 1 | 0.310 | 4.109 | 0.662 |
| CD8_density [per 50 cells/mm²] | −0.139 | 1.029 | 1 | 0.310 | 4.109 | 0.662 |
| CD8_density [per 50 cells/mm²] | −0.139 | 1.029 | 1 | 0.310 | 4.109 | 0.662 |
| CD8_per_pos [per 2%-points] | −0.200 | 1.396 | 1 | 0.237 | 4.860 | 0.562 |
| CD8_per_pos [per 2%-points] | −0.200 | 1.396 | 1 | 0.237 | 4.860 | 0.562 |
| CD8_per_pos [per 2%-points] | −0.200 | 1.396 | 1 | 0.237 | 4.860 | 0.562 |
| Cytotoxic_T_cell_dist_CD20 [per 20 µm] | −0.086 | 0.150 | 1 | 0.699 | 1.617 | 0.951 |
| Cytotoxic_T_cell_dist_CD20 [per 20 µm] | −0.086 | 0.150 | 1 | 0.699 | 1.617 | 0.951 |
| Cytotoxic_T_cell_dist_CD20 [per 20 µm] | −0.086 | 0.150 | 1 | 0.699 | 1.617 | 0.951 |
| Cytotoxic_T_cell_dist_CD4 [per 20 µm] | −0.094 | 0.181 | 1 | 0.671 | 1.738 | 0.942 |
| Cytotoxic_T_cell_dist_CD4 [per 20 µm] | −0.094 | 0.181 | 1 | 0.671 | 1.738 | 0.942 |
| Cytotoxic_T_cell_dist_CD4 [per 20 µm] | −0.094 | 0.181 | 1 | 0.671 | 1.738 | 0.942 |
| Cytotoxic_T_cell_dist_CD4FOXP3 [per 20 µm] | 0.066 | 0.153 | 1 | 0.695 | 1.585 | 0.954 |
| Cytotoxic_T_cell_dist_CD4FOXP3 [per 20 µm] | 0.066 | 0.153 | 1 | 0.695 | 1.585 | 0.954 |
| Cytotoxic_T_cell_dist_CD4FOXP3 [per 20 µm] | 0.066 | 0.153 | 1 | 0.695 | 1.585 | 0.954 |
| Cytotoxic_T_cell_dist_CD68 [per 20 µm] | 0.033 | 0.036 | 1 | 0.849 | 1.501 | 0.959 |
| Cytotoxic_T_cell_dist_CD68 [per 20 µm] | 0.033 | 0.036 | 1 | 0.849 | 1.501 | 0.959 |
| Cytotoxic_T_cell_dist_CD68 [per 20 µm] | 0.033 | 0.036 | 1 | 0.849 | 1.501 | 0.959 |
| Macrophage_dist_CD20 [per 20 µm] | −0.103 | 0.270 | 1 | 0.603 | 1.870 | 0.931 |
| Macrophage_dist_CD20 [per 20 µm] | −0.103 | 0.270 | 1 | 0.603 | 1.870 | 0.931 |
| Macrophage_dist_CD20 [per 20 µm] | −0.103 | 0.270 | 1 | 0.603 | 1.870 | 0.931 |
| Macrophage_dist_CD4 [per 20 µm] | −0.338 | 1.211 | 1 | 0.271 | 2.632 | 0.853 |
| Macrophage_dist_CD4 [per 20 µm] | −0.338 | 1.211 | 1 | 0.271 | 2.632 | 0.853 |
| Macrophage_dist_CD4 [per 20 µm] | −0.338 | 1.211 | 1 | 0.271 | 2.632 | 0.853 |
| Macrophage_dist_CD4FOXP3 [per 20 µm] | 0.083 | 0.137 | 1 | 0.711 | 1.772 | 0.939 |
| Macrophage_dist_CD4FOXP3 [per 20 µm] | 0.083 | 0.137 | 1 | 0.711 | 1.772 | 0.939 |
| Macrophage_dist_CD4FOXP3 [per 20 µm] | 0.083 | 0.137 | 1 | 0.711 | 1.772 | 0.939 |
| Macrophage_dist_CD8 [per 20 µm] | −0.155 | 0.487 | 1 | 0.485 | 1.875 | 0.931 |
| Macrophage_dist_CD8 [per 20 µm] | −0.155 | 0.487 | 1 | 0.485 | 1.875 | 0.931 |
| Macrophage_dist_CD8 [per 20 µm] | −0.155 | 0.487 | 1 | 0.485 | 1.875 | 0.931 |
| T_helper_dist_CD20 [per 20 µm] | −0.098 | 0.209 | 1 | 0.648 | 1.889 | 0.930 |
| T_helper_dist_CD20 [per 20 µm] | −0.098 | 0.209 | 1 | 0.648 | 1.889 | 0.930 |
| T_helper_dist_CD20 [per 20 µm] | −0.098 | 0.209 | 1 | 0.648 | 1.889 | 0.930 |
| T_helper_dist_CD4FOXP3 [per 20 µm] | 0.096 | 0.197 | 1 | 0.658 | 1.861 | 0.932 |
| T_helper_dist_CD4FOXP3 [per 20 µm] | 0.096 | 0.197 | 1 | 0.658 | 1.861 | 0.932 |
| T_helper_dist_CD4FOXP3 [per 20 µm] | 0.096 | 0.197 | 1 | 0.658 | 1.861 | 0.932 |
| T_helper_dist_CD68 [per 20 µm] | 0.029 | 0.036 | 1 | 0.850 | 1.685 | 0.946 |
| T_helper_dist_CD68 [per 20 µm] | 0.029 | 0.036 | 1 | 0.850 | 1.685 | 0.946 |
| T_helper_dist_CD68 [per 20 µm] | 0.029 | 0.036 | 1 | 0.850 | 1.685 | 0.946 |
| T_helper_dist_CD8 [per 20 µm] | 0.110 | 0.061 | 1 | 0.805 | 1.735 | 0.942 |
| T_helper_dist_CD8 [per 20 µm] | 0.110 | 0.061 | 1 | 0.805 | 1.735 | 0.942 |
| T_helper_dist_CD8 [per 20 µm] | 0.110 | 0.061 | 1 | 0.805 | 1.735 | 0.942 |
| T_reg_dist_CD20 [per 20 µm] | −0.119 | 0.335 | 1 | 0.563 | 5.130 | 0.527 |
| T_reg_dist_CD20 [per 20 µm] | −0.119 | 0.335 | 1 | 0.563 | 5.130 | 0.527 |
| T_reg_dist_CD20 [per 20 µm] | −0.119 | 0.335 | 1 | 0.563 | 5.130 | 0.527 |
| T_reg_dist_CD4 [per 20 µm] | −0.330 | 1.280 | 1 | 0.258 | 5.823 | 0.443 |
| T_reg_dist_CD4 [per 20 µm] | −0.330 | 1.280 | 1 | 0.258 | 5.823 | 0.443 |
| T_reg_dist_CD4 [per 20 µm] | −0.330 | 1.280 | 1 | 0.258 | 5.823 | 0.443 |
| T_reg_dist_CD68 [per 20 µm] | 0.367 | 1.640 | 1 | 0.200 | 6.045 | 0.418 |
| T_reg_dist_CD68 [per 20 µm] | 0.367 | 1.640 | 1 | 0.200 | 6.045 | 0.418 |
| T_reg_dist_CD68 [per 20 µm] | 0.367 | 1.640 | 1 | 0.200 | 6.045 | 0.418 |
| T_reg_dist_CD8 [per 20 µm] | 0.121 | 0.254 | 1 | 0.614 | 4.795 | 0.570 |
| T_reg_dist_CD8 [per 20 µm] | 0.121 | 0.254 | 1 | 0.614 | 4.795 | 0.570 |
| T_reg_dist_CD8 [per 20 µm] | 0.121 | 0.254 | 1 | 0.614 | 4.795 | 0.570 |
| Low RS | | | | | | |
| B_cell_dist_CD4 [per 20 µm] | −0.150 | 0.025 | 1 | 0.875 | 6.045 | 0.418 |
| B_cell_dist_CD4 [per 20 µm] | −0.150 | 0.025 | 1 | 0.875 | 6.045 | 0.418 |
| B_cell_dist_CD4 [per 20 µm] | −0.150 | 0.025 | 1 | 0.875 | 6.045 | 0.418 |
| B_cell_dist_CD4FOXP3 [per 20 µm] | 0.512 | 0.633 | 1 | 0.426 | 8.294 | 0.217 |
| B_cell_dist_CD4FOXP3 [per 20 µm] | 0.512 | 0.633 | 1 | 0.426 | 8.294 | 0.217 |
| B_cell_dist_CD4FOXP3 [per 20 µm] | 0.512 | 0.633 | 1 | 0.426 | 8.294 | 0.217 |
| B_cell_dist_CD68 [per 20 µm] | 0.340 | 0.752 | 1 | 0.386 | 6.971 | 0.323 |
| B_cell_dist_CD68 [per 20 µm] | 0.340 | 0.752 | 1 | 0.386 | 6.971 | 0.323 |
| B_cell_dist_CD68 [per 20 µm] | 0.340 | 0.752 | 1 | 0.386 | 6.971 | 0.323 |
| B_cell_dist_CD8 [per 20 µm] | 0.196 | 0.444 | 1 | 0.505 | 5.989 | 0.424 |
| B_cell_dist_CD8 [per 20 µm] | 0.196 | 0.444 | 1 | 0.505 | 5.989 | 0.424 |
| B_cell_dist_CD8 [per 20 µm] | 0.196 | 0.444 | 1 | 0.505 | 5.989 | 0.424 |
| CD20_density [per 50 cells/mm²] | −0.229 | 0.819 | 1 | 0.366 | 4.976 | 0.547 |
| CD20_density [per 50 cells/mm²] | −0.229 | 0.819 | 1 | 0.366 | 4.976 | 0.547 |
| CD20_density [per 50 cells/mm²] | −0.229 | 0.819 | 1 | 0.366 | 4.976 | 0.547 |
| CD20_per_pos [per 2%-points] | −0.266 | 0.831 | 1 | 0.362 | 5.000 | 0.544 |
| CD20_per_pos [per 2%-points] | −0.266 | 0.831 | 1 | 0.362 | 5.000 | 0.544 |
| CD20_per_pos [per 2%-points] | −0.266 | 0.831 | 1 | 0.362 | 5.000 | 0.544 |
| CD4FOXP3_density [per 50 cells/mm²] | −0.101 | 0.114 | 1 | 0.735 | 4.353 | 0.629 |
| CD4FOXP3_density [per 50 cells/mm²] | −0.101 | 0.114 | 1 | 0.735 | 4.353 | 0.629 |
| CD4FOXP3_density [per 50 cells/mm²] | −0.101 | 0.114 | 1 | 0.735 | 4.353 | 0.629 |
| CD4FOXP3_per_pos [per 2%-points] | −0.099 | 0.188 | 1 | 0.665 | 4.280 | 0.639 |
| CD4FOXP3_per_pos [per 2%-points] | −0.099 | 0.188 | 1 | 0.665 | 4.280 | 0.639 |
| CD4FOXP3_per_pos [per 2%-points] | −0.099 | 0.188 | 1 | 0.665 | 4.280 | 0.639 |
| CD4_density [per 50 cells/mm²] | 0.225 | 1.998 | 1 | 0.158 | 5.897 | 0.435 |
| CD4_density [per 50 cells/mm²] | 0.225 | 1.998 | 1 | 0.158 | 5.897 | 0.435 |
| CD4_density [per 50 cells/mm²] | 0.225 | 1.998 | 1 | 0.158 | 5.897 | 0.435 |
| CD4_per_pos [per 2%-points] | 0.274 | 2.886 | 1 | 0.089 | 6.989 | 0.322 |
| CD4_per_pos [per 2%-points] | 0.274 | 2.886 | 1 | 0.089 | 6.989 | 0.322 |
| CD4_per_pos [per 2%-points] | 0.274 | 2.886 | 1 | 0.089 | 6.989 | 0.322 |
| CD68_density [per 50 cells/mm²] | −0.247 | 0.520 | 1 | 0.471 | 5.322 | 0.503 |
| CD68_density [per 50 cells/mm²] | −0.247 | 0.520 | 1 | 0.471 | 5.322 | 0.503 |
| CD68_density [per 50 cells/mm²] | −0.247 | 0.520 | 1 | 0.471 | 5.322 | 0.503 |
| CD68_per_pos [per 2%-points] | −0.165 | 0.533 | 1 | 0.465 | 4.590 | 0.597 |
| CD68_per_pos [per 2%-points] | −0.165 | 0.533 | 1 | 0.465 | 4.590 | 0.597 |
| CD68_per_pos [per 2%-points] | −0.165 | 0.533 | 1 | 0.465 | 4.590 | 0.597 |
| CD8_density [per 50 cells/mm²] | −0.171 | 0.796 | 1 | 0.372 | 5.010 | 0.543 |
| CD8_density [per 50 cells/mm²] | −0.171 | 0.796 | 1 | 0.372 | 5.010 | 0.543 |
| CD8_density [per 50 cells/mm²] | −0.171 | 0.796 | 1 | 0.372 | 5.010 | 0.543 |
| CD8_per_pos [per 2%-points] | −0.157 | 0.832 | 1 | 0.362 | 5.000 | 0.544 |
| CD8_per_pos [per 2%-points] | −0.157 | 0.832 | 1 | 0.362 | 5.000 | 0.544 |
| CD8_per_pos [per 2%-points] | −0.157 | 0.832 | 1 | 0.362 | 5.000 | 0.544 |
| Cytotoxic_T_cell_dist_CD20 [per 20 µm] | 0.223 | 1.062 | 1 | 0.303 | 3.028 | 0.805 |
| Cytotoxic_T_cell_dist_CD20 [per 20 µm] | 0.223 | 1.062 | 1 | 0.303 | 3.028 | 0.805 |
| Cytotoxic_T_cell_dist_CD20 [per 20 µm] | 0.223 | 1.062 | 1 | 0.303 | 3.028 | 0.805 |
| Cytotoxic_T_cell_dist_CD4 [per 20 µm] | 0.482 | 2.169 | 1 | 0.141 | 6.229 | 0.398 |
| Cytotoxic_T_cell_dist_CD4 [per 20 µm] | 0.482 | 2.169 | 1 | 0.141 | 6.229 | 0.398 |
| Cytotoxic_T_cell_dist_CD4 [per 20 µm] | 0.482 | 2.169 | 1 | 0.141 | 6.229 | 0.398 |
| Cytotoxic_T_cell_dist_CD4FOXP3 [per 20 µm] | 0.214 | 0.065 | 1 | 0.799 | 3.754 | 0.710 |
| Cytotoxic_T_cell_dist_CD4FOXP3 [per 20 µm] | 0.214 | 0.065 | 1 | 0.799 | 3.754 | 0.710 |
| Cytotoxic_T_cell_dist_CD4FOXP3 [per 20 µm] | 0.214 | 0.065 | 1 | 0.799 | 3.754 | 0.710 |
| Cytotoxic_T_cell_dist_CD68 [per 20 µm] | 0.211 | 0.160 | 1 | 0.689 | 2.896 | 0.822 |
| Cytotoxic_T_cell_dist_CD68 [per 20 µm] | 0.211 | 0.160 | 1 | 0.689 | 2.896 | 0.822 |
| Cytotoxic_T_cell_dist_CD68 [per 20 µm] | 0.211 | 0.160 | 1 | 0.689 | 2.896 | 0.822 |
| Macrophage_dist_CD20 [per 20 µm] | 0.371 | 1.920 | 1 | 0.166 | 3.115 | 0.794 |
| Macrophage_dist_CD20 [per 20 µm] | 0.371 | 1.920 | 1 | 0.166 | 3.115 | 0.794 |
| Macrophage_dist_CD20 [per 20 µm] | 0.371 | 1.920 | 1 | 0.166 | 3.115 | 0.794 |
| Macrophage_dist_CD4 [per 20 µm] | 0.346 | 0.685 | 1 | 0.408 | 3.168 | 0.788 |
| Macrophage_dist_CD4 [per 20 µm] | 0.346 | 0.685 | 1 | 0.408 | 3.168 | 0.788 |
| Macrophage_dist_CD4 [per 20 µm] | 0.346 | 0.685 | 1 | 0.408 | 3.168 | 0.788 |
| Macrophage_dist_CD4FOXP3 [per 20 µm] | 0.070 | 0.012 | 1 | 0.913 | 1.584 | 0.954 |
| Macrophage_dist_CD4FOXP3 [per 20 µm] | 0.070 | 0.012 | 1 | 0.913 | 1.584 | 0.954 |
| Macrophage_dist_CD4FOXP3 [per 20 µm] | 0.070 | 0.012 | 1 | 0.913 | 1.584 | 0.954 |
| Macrophage_dist_CD8 [per 20 µm] | 0.043 | 0.004 | 1 | 0.950 | 1.639 | 0.950 |
| Macrophage_dist_CD8 [per 20 µm] | 0.043 | 0.004 | 1 | 0.950 | 1.639 | 0.950 |
| Macrophage_dist_CD8 [per 20 µm] | 0.043 | 0.004 | 1 | 0.950 | 1.639 | 0.950 |
| T_helper_dist_CD20 [per 20 µm] | 0.398 | 2.723 | 1 | 0.099 | 4.643 | 0.590 |
| T_helper_dist_CD20 [per 20 µm] | 0.398 | 2.723 | 1 | 0.099 | 4.643 | 0.590 |
| T_helper_dist_CD20 [per 20 µm] | 0.398 | 2.723 | 1 | 0.099 | 4.643 | 0.590 |
| T_helper_dist_CD4FOXP3 [per 20 µm] | 0.097 | 0.025 | 1 | 0.875 | 2.905 | 0.821 |
| T_helper_dist_CD4FOXP3 [per 20 µm] | 0.097 | 0.025 | 1 | 0.875 | 2.905 | 0.821 |
| T_helper_dist_CD4FOXP3 [per 20 µm] | 0.097 | 0.025 | 1 | 0.875 | 2.905 | 0.821 |
| T_helper_dist_CD68 [per 20 µm] | 0.221 | 0.464 | 1 | 0.496 | 3.759 | 0.709 |
| T_helper_dist_CD68 [per 20 µm] | 0.221 | 0.464 | 1 | 0.496 | 3.759 | 0.709 |
| T_helper_dist_CD68 [per 20 µm] | 0.221 | 0.464 | 1 | 0.496 | 3.759 | 0.709 |
| T_helper_dist_CD8 [per 20 µm] | 0.126 | 0.144 | 1 | 0.704 | 3.194 | 0.784 |
| T_helper_dist_CD8 [per 20 µm] | 0.126 | 0.144 | 1 | 0.704 | 3.194 | 0.784 |
| T_helper_dist_CD8 [per 20 µm] | 0.126 | 0.144 | 1 | 0.704 | 3.194 | 0.784 |
| T_reg_dist_CD20 [per 20 µm] | 0.327 | 0.940 | 1 | 0.332 | 3.573 | 0.734 |
| T_reg_dist_CD20 [per 20 µm] | 0.327 | 0.940 | 1 | 0.332 | 3.573 | 0.734 |
| T_reg_dist_CD20 [per 20 µm] | 0.327 | 0.940 | 1 | 0.332 | 3.573 | 0.734 |
| T_reg_dist_CD4 [per 20 µm] | −0.265 | 0.018 | 1 | 0.895 | 3.940 | 0.685 |
| T_reg_dist_CD4 [per 20 µm] | −0.265 | 0.018 | 1 | 0.895 | 3.940 | 0.685 |
| T_reg_dist_CD4 [per 20 µm] | −0.265 | 0.018 | 1 | 0.895 | 3.940 | 0.685 |
| T_reg_dist_CD68 [per 20 µm] | −0.150 | 0.013 | 1 | 0.910 | 3.814 | 0.702 |
| T_reg_dist_CD68 [per 20 µm] | −0.150 | 0.013 | 1 | 0.910 | 3.814 | 0.702 |
| T_reg_dist_CD68 [per 20 µm] | −0.150 | 0.013 | 1 | 0.910 | 3.814 | 0.702 |
| T_reg_dist_CD8 [per 20 µm] | 0.201 | 0.002 | 1 | 0.966 | 3.811 | 0.702 |
| T_reg_dist_CD8 [per 20 µm] | 0.201 | 0.002 | 1 | 0.966 | 3.811 | 0.702 |
| T_reg_dist_CD8 [per 20 µm] | 0.201 | 0.002 | 1 | 0.966 | 3.811 | 0.702 |
|  | | | | | | |

| *Table S9. Epithelial immune variable (iTIL) Proportional Hazard (PH) checks across strata of Oncotype Dx RS categories.* | | | | | | |
| --- | --- | --- | --- | --- | --- | --- |
| Covariate | **rho** | **Chi-square** | **df** | ***p*** | **Global Chi-square** | **Global *p*** |
| High RS | | | | | | |
| B_cell_dist_CD68 [per 20 µm] | 0.378 | 0.035 | 1 | 0.851 | 3.656 | 0.723 |
| B_cell_dist_CD68 [per 20 µm] | 0.378 | 0.035 | 1 | 0.851 | 3.656 | 0.723 |
| B_cell_dist_CD68 [per 20 µm] | 0.378 | 0.035 | 1 | 0.851 | 3.656 | 0.723 |
| B_cell_dist_CD8 [per 20 µm] | 0.106 | 0.003 | 1 | 0.955 | 2.188 | 0.902 |
| B_cell_dist_CD8 [per 20 µm] | 0.106 | 0.003 | 1 | 0.955 | 2.188 | 0.902 |
| B_cell_dist_CD8 [per 20 µm] | 0.106 | 0.003 | 1 | 0.955 | 2.188 | 0.902 |
| CD20_per_pos [per 2%-points] | −0.087 | 0.052 | 1 | 0.819 | 8.456 | 0.207 |
| CD20_per_pos [per 2%-points] | −0.087 | 0.052 | 1 | 0.819 | 8.456 | 0.207 |
| CD20_per_pos [per 2%-points] | −0.087 | 0.052 | 1 | 0.819 | 8.456 | 0.207 |
| CD4FOXP3_per_pos [per 2%-points] | −0.224 | 0.184 | 1 | 0.668 | 8.830 | 0.183 |
| CD4FOXP3_per_pos [per 2%-points] | −0.224 | 0.184 | 1 | 0.668 | 8.830 | 0.183 |
| CD4FOXP3_per_pos [per 2%-points] | −0.224 | 0.184 | 1 | 0.668 | 8.830 | 0.183 |
| CD4_per_pos [per 2%-points] | −0.082 | 0.080 | 1 | 0.778 | 8.472 | 0.206 |
| CD4_per_pos [per 2%-points] | −0.082 | 0.080 | 1 | 0.778 | 8.472 | 0.206 |
| CD4_per_pos [per 2%-points] | −0.082 | 0.080 | 1 | 0.778 | 8.472 | 0.206 |
| CD68_per_pos [per 2%-points] | −0.321 | 0.169 | 1 | 0.681 | 9.942 | 0.127 |
| CD68_per_pos [per 2%-points] | −0.321 | 0.169 | 1 | 0.681 | 9.942 | 0.127 |
| CD68_per_pos [per 2%-points] | −0.321 | 0.169 | 1 | 0.681 | 9.942 | 0.127 |
| CD8_per_pos [per 2%-points] | 0.066 | 0.994 | 1 | 0.319 | 7.932 | 0.243 |
| CD8_per_pos [per 2%-points] | 0.066 | 0.994 | 1 | 0.319 | 7.932 | 0.243 |
| CD8_per_pos [per 2%-points] | 0.066 | 0.994 | 1 | 0.319 | 7.932 | 0.243 |
| Cytotoxic_T_cell_dist_CD68 [per 20 µm] | −0.021 | 0.005 | 1 | 0.942 | 6.293 | 0.391 |
| Cytotoxic_T_cell_dist_CD68 [per 20 µm] | −0.021 | 0.005 | 1 | 0.942 | 6.293 | 0.391 |
| Cytotoxic_T_cell_dist_CD68 [per 20 µm] | −0.021 | 0.005 | 1 | 0.942 | 6.293 | 0.391 |
| T_helper_dist_CD68 [per 20 µm] | 0.310 | 0.024 | 1 | 0.877 | 5.219 | 0.516 |
| T_helper_dist_CD68 [per 20 µm] | 0.310 | 0.024 | 1 | 0.877 | 5.219 | 0.516 |
| T_helper_dist_CD68 [per 20 µm] | 0.310 | 0.024 | 1 | 0.877 | 5.219 | 0.516 |
| T_reg_dist_CD4 [per 20 µm] | −0.075 | 0.137 | 1 | 0.711 | 7.388 | 0.286 |
| T_reg_dist_CD4 [per 20 µm] | −0.075 | 0.137 | 1 | 0.711 | 7.388 | 0.286 |
| T_reg_dist_CD4 [per 20 µm] | −0.075 | 0.137 | 1 | 0.711 | 7.388 | 0.286 |
| T_reg_dist_CD68 [per 20 µm] | 0.374 | 0.084 | 1 | 0.772 | 10.101 | 0.120 |
| T_reg_dist_CD68 [per 20 µm] | 0.374 | 0.084 | 1 | 0.772 | 10.101 | 0.120 |
| T_reg_dist_CD68 [per 20 µm] | 0.374 | 0.084 | 1 | 0.772 | 10.101 | 0.120 |
| Tumour_cell_dist_CD68 [per 20 µm] | 0.232 | 0.061 | 1 | 0.805 | 8.507 | 0.203 |
| Tumour_cell_dist_CD68 [per 20 µm] | 0.232 | 0.061 | 1 | 0.805 | 8.507 | 0.203 |
| Tumour_cell_dist_CD68 [per 20 µm] | 0.232 | 0.061 | 1 | 0.805 | 8.507 | 0.203 |
| Intermediate RS | | | | | | |
| B_cell_dist_CD4 [per 20 µm] | −0.225 | 0.012 | 1 | 0.913 | 0.747 | 0.993 |
| B_cell_dist_CD4 [per 20 µm] | −0.225 | 0.012 | 1 | 0.913 | 0.747 | 0.993 |
| B_cell_dist_CD4 [per 20 µm] | −0.225 | 0.012 | 1 | 0.913 | 0.747 | 0.993 |
| B_cell_dist_CD68 [per 20 µm] | 0.217 | 0.356 | 1 | 0.551 | 1.005 | 0.985 |
| B_cell_dist_CD68 [per 20 µm] | 0.217 | 0.356 | 1 | 0.551 | 1.005 | 0.985 |
| B_cell_dist_CD68 [per 20 µm] | 0.217 | 0.356 | 1 | 0.551 | 1.005 | 0.985 |
| B_cell_dist_CD8 [per 20 µm] | −0.360 | 1.133 | 1 | 0.287 | 2.101 | 0.910 |
| B_cell_dist_CD8 [per 20 µm] | −0.360 | 1.133 | 1 | 0.287 | 2.101 | 0.910 |
| B_cell_dist_CD8 [per 20 µm] | −0.360 | 1.133 | 1 | 0.287 | 2.101 | 0.910 |
| CD20_density [per 50 cells/mm²] | −0.259 | 0.863 | 1 | 0.353 | 3.924 | 0.687 |
| CD20_density [per 50 cells/mm²] | −0.259 | 0.863 | 1 | 0.353 | 3.924 | 0.687 |
| CD20_density [per 50 cells/mm²] | −0.259 | 0.863 | 1 | 0.353 | 3.924 | 0.687 |
| CD20_per_pos [per 2%-points] | −0.253 | 0.996 | 1 | 0.318 | 4.100 | 0.663 |
| CD20_per_pos [per 2%-points] | −0.253 | 0.996 | 1 | 0.318 | 4.100 | 0.663 |
| CD20_per_pos [per 2%-points] | −0.253 | 0.996 | 1 | 0.318 | 4.100 | 0.663 |
| CD4FOXP3_density [per 50 cells/mm²] | −0.001 | 0.015 | 1 | 0.901 | 3.070 | 0.800 |
| CD4FOXP3_density [per 50 cells/mm²] | −0.001 | 0.015 | 1 | 0.901 | 3.070 | 0.800 |
| CD4FOXP3_density [per 50 cells/mm²] | −0.001 | 0.015 | 1 | 0.901 | 3.070 | 0.800 |
| CD4FOXP3_per_pos [per 2%-points] | −0.005 | 0.011 | 1 | 0.916 | 3.061 | 0.801 |
| CD4FOXP3_per_pos [per 2%-points] | −0.005 | 0.011 | 1 | 0.916 | 3.061 | 0.801 |
| CD4FOXP3_per_pos [per 2%-points] | −0.005 | 0.011 | 1 | 0.916 | 3.061 | 0.801 |
| CD4_density [per 50 cells/mm²] | 0.030 | 0.035 | 1 | 0.851 | 3.099 | 0.796 |
| CD4_density [per 50 cells/mm²] | 0.030 | 0.035 | 1 | 0.851 | 3.099 | 0.796 |
| CD4_density [per 50 cells/mm²] | 0.030 | 0.035 | 1 | 0.851 | 3.099 | 0.796 |
| CD4_per_pos [per 2%-points] | 0.091 | 0.328 | 1 | 0.567 | 3.325 | 0.767 |
| CD4_per_pos [per 2%-points] | 0.091 | 0.328 | 1 | 0.567 | 3.325 | 0.767 |
| CD4_per_pos [per 2%-points] | 0.091 | 0.328 | 1 | 0.567 | 3.325 | 0.767 |
| CD68_density [per 50 cells/mm²] | −0.181 | 0.428 | 1 | 0.513 | 3.600 | 0.731 |
| CD68_density [per 50 cells/mm²] | −0.181 | 0.428 | 1 | 0.513 | 3.600 | 0.731 |
| CD68_density [per 50 cells/mm²] | −0.181 | 0.428 | 1 | 0.513 | 3.600 | 0.731 |
| CD68_per_pos [per 2%-points] | −0.091 | 0.057 | 1 | 0.811 | 3.160 | 0.788 |
| CD68_per_pos [per 2%-points] | −0.091 | 0.057 | 1 | 0.811 | 3.160 | 0.788 |
| CD68_per_pos [per 2%-points] | −0.091 | 0.057 | 1 | 0.811 | 3.160 | 0.788 |
| CD8_density [per 50 cells/mm²] | −0.119 | 0.368 | 1 | 0.544 | 3.491 | 0.745 |
| CD8_density [per 50 cells/mm²] | −0.119 | 0.368 | 1 | 0.544 | 3.491 | 0.745 |
| CD8_density [per 50 cells/mm²] | −0.119 | 0.368 | 1 | 0.544 | 3.491 | 0.745 |
| CD8_per_pos [per 2%-points] | −0.014 | 0.070 | 1 | 0.792 | 2.830 | 0.830 |
| CD8_per_pos [per 2%-points] | −0.014 | 0.070 | 1 | 0.792 | 2.830 | 0.830 |
| CD8_per_pos [per 2%-points] | −0.014 | 0.070 | 1 | 0.792 | 2.830 | 0.830 |
| Cytotoxic_T_cell_dist_CD20 [per 20 µm] | −0.166 | 0.542 | 1 | 0.461 | 4.147 | 0.657 |
| Cytotoxic_T_cell_dist_CD20 [per 20 µm] | −0.166 | 0.542 | 1 | 0.461 | 4.147 | 0.657 |
| Cytotoxic_T_cell_dist_CD20 [per 20 µm] | −0.166 | 0.542 | 1 | 0.461 | 4.147 | 0.657 |
| Cytotoxic_T_cell_dist_CD4 [per 20 µm] | −0.225 | 0.241 | 1 | 0.623 | 3.949 | 0.684 |
| Cytotoxic_T_cell_dist_CD4 [per 20 µm] | −0.225 | 0.241 | 1 | 0.623 | 3.949 | 0.684 |
| Cytotoxic_T_cell_dist_CD4 [per 20 µm] | −0.225 | 0.241 | 1 | 0.623 | 3.949 | 0.684 |
| Cytotoxic_T_cell_dist_CD4FOXP3 [per 20 µm] | −0.065 | 0.035 | 1 | 0.851 | 3.649 | 0.724 |
| Cytotoxic_T_cell_dist_CD4FOXP3 [per 20 µm] | −0.065 | 0.035 | 1 | 0.851 | 3.649 | 0.724 |
| Cytotoxic_T_cell_dist_CD4FOXP3 [per 20 µm] | −0.065 | 0.035 | 1 | 0.851 | 3.649 | 0.724 |
| Cytotoxic_T_cell_dist_CD68 [per 20 µm] | −0.059 | 0.000 | 1 | 0.985 | 3.619 | 0.728 |
| Cytotoxic_T_cell_dist_CD68 [per 20 µm] | −0.059 | 0.000 | 1 | 0.985 | 3.619 | 0.728 |
| Cytotoxic_T_cell_dist_CD68 [per 20 µm] | −0.059 | 0.000 | 1 | 0.985 | 3.619 | 0.728 |
| Macrophage_dist_CD20 [per 20 µm] | −0.089 | 0.265 | 1 | 0.607 | 4.017 | 0.674 |
| Macrophage_dist_CD20 [per 20 µm] | −0.089 | 0.265 | 1 | 0.607 | 4.017 | 0.674 |
| Macrophage_dist_CD20 [per 20 µm] | −0.089 | 0.265 | 1 | 0.607 | 4.017 | 0.674 |
| Macrophage_dist_CD4 [per 20 µm] | −0.271 | 0.433 | 1 | 0.511 | 4.010 | 0.675 |
| Macrophage_dist_CD4 [per 20 µm] | −0.271 | 0.433 | 1 | 0.511 | 4.010 | 0.675 |
| Macrophage_dist_CD4 [per 20 µm] | −0.271 | 0.433 | 1 | 0.511 | 4.010 | 0.675 |
| Macrophage_dist_CD4FOXP3 [per 20 µm] | −0.004 | 0.002 | 1 | 0.966 | 3.659 | 0.723 |
| Macrophage_dist_CD4FOXP3 [per 20 µm] | −0.004 | 0.002 | 1 | 0.966 | 3.659 | 0.723 |
| Macrophage_dist_CD4FOXP3 [per 20 µm] | −0.004 | 0.002 | 1 | 0.966 | 3.659 | 0.723 |
| Macrophage_dist_CD8 [per 20 µm] | −0.195 | 0.594 | 1 | 0.441 | 4.178 | 0.653 |
| Macrophage_dist_CD8 [per 20 µm] | −0.195 | 0.594 | 1 | 0.441 | 4.178 | 0.653 |
| Macrophage_dist_CD8 [per 20 µm] | −0.195 | 0.594 | 1 | 0.441 | 4.178 | 0.653 |
| T_helper_dist_CD20 [per 20 µm] | −0.104 | 0.290 | 1 | 0.590 | 3.986 | 0.679 |
| T_helper_dist_CD20 [per 20 µm] | −0.104 | 0.290 | 1 | 0.590 | 3.986 | 0.679 |
| T_helper_dist_CD20 [per 20 µm] | −0.104 | 0.290 | 1 | 0.590 | 3.986 | 0.679 |
| T_helper_dist_CD4FOXP3 [per 20 µm] | −0.104 | 0.118 | 1 | 0.731 | 3.774 | 0.707 |
| T_helper_dist_CD4FOXP3 [per 20 µm] | −0.104 | 0.118 | 1 | 0.731 | 3.774 | 0.707 |
| T_helper_dist_CD4FOXP3 [per 20 µm] | −0.104 | 0.118 | 1 | 0.731 | 3.774 | 0.707 |
| T_helper_dist_CD68 [per 20 µm] | −0.039 | 0.002 | 1 | 0.963 | 3.697 | 0.718 |
| T_helper_dist_CD68 [per 20 µm] | −0.039 | 0.002 | 1 | 0.963 | 3.697 | 0.718 |
| T_helper_dist_CD68 [per 20 µm] | −0.039 | 0.002 | 1 | 0.963 | 3.697 | 0.718 |
| T_helper_dist_CD8 [per 20 µm] | −0.444 | 3.591 | 1 | 0.058 | 6.618 | 0.358 |
| T_helper_dist_CD8 [per 20 µm] | −0.444 | 3.591 | 1 | 0.058 | 6.618 | 0.358 |
| T_helper_dist_CD8 [per 20 µm] | −0.444 | 3.591 | 1 | 0.058 | 6.618 | 0.358 |
| T_reg_dist_CD20 [per 20 µm] | −0.498 | 2.411 | 1 | 0.121 | 7.904 | 0.245 |
| T_reg_dist_CD20 [per 20 µm] | −0.498 | 2.411 | 1 | 0.121 | 7.904 | 0.245 |
| T_reg_dist_CD20 [per 20 µm] | −0.498 | 2.411 | 1 | 0.121 | 7.904 | 0.245 |
| T_reg_dist_CD4 [per 20 µm] | −0.107 | 0.026 | 1 | 0.873 | 6.715 | 0.348 |
| T_reg_dist_CD4 [per 20 µm] | −0.107 | 0.026 | 1 | 0.873 | 6.715 | 0.348 |
| T_reg_dist_CD4 [per 20 µm] | −0.107 | 0.026 | 1 | 0.873 | 6.715 | 0.348 |
| T_reg_dist_CD68 [per 20 µm] | −0.456 | 0.952 | 1 | 0.329 | 9.333 | 0.156 |
| T_reg_dist_CD68 [per 20 µm] | −0.456 | 0.952 | 1 | 0.329 | 9.333 | 0.156 |
| T_reg_dist_CD68 [per 20 µm] | −0.456 | 0.952 | 1 | 0.329 | 9.333 | 0.156 |
| T_reg_dist_CD8 [per 20 µm] | −0.075 | 0.375 | 1 | 0.540 | 7.149 | 0.307 |
| T_reg_dist_CD8 [per 20 µm] | −0.075 | 0.375 | 1 | 0.540 | 7.149 | 0.307 |
| T_reg_dist_CD8 [per 20 µm] | −0.075 | 0.375 | 1 | 0.540 | 7.149 | 0.307 |
| Tumour_cell_dist_CD20 [per 20 µm] | −0.071 | 0.162 | 1 | 0.688 | 3.860 | 0.696 |
| Tumour_cell_dist_CD20 [per 20 µm] | −0.071 | 0.162 | 1 | 0.688 | 3.860 | 0.696 |
| Tumour_cell_dist_CD20 [per 20 µm] | −0.071 | 0.162 | 1 | 0.688 | 3.860 | 0.696 |
| Tumour_cell_dist_CD4 [per 20 µm] | −0.236 | 0.466 | 1 | 0.495 | 4.095 | 0.664 |
| Tumour_cell_dist_CD4 [per 20 µm] | −0.236 | 0.466 | 1 | 0.495 | 4.095 | 0.664 |
| Tumour_cell_dist_CD4 [per 20 µm] | −0.236 | 0.466 | 1 | 0.495 | 4.095 | 0.664 |
| Tumour_cell_dist_CD4FOXP3 [per 20 µm] | −0.054 | 0.027 | 1 | 0.868 | 3.708 | 0.716 |
| Tumour_cell_dist_CD4FOXP3 [per 20 µm] | −0.054 | 0.027 | 1 | 0.868 | 3.708 | 0.716 |
| Tumour_cell_dist_CD4FOXP3 [per 20 µm] | −0.054 | 0.027 | 1 | 0.868 | 3.708 | 0.716 |
| Tumour_cell_dist_CD68 [per 20 µm] | −0.040 | 0.001 | 1 | 0.975 | 3.708 | 0.716 |
| Tumour_cell_dist_CD68 [per 20 µm] | −0.040 | 0.001 | 1 | 0.975 | 3.708 | 0.716 |
| Tumour_cell_dist_CD68 [per 20 µm] | −0.040 | 0.001 | 1 | 0.975 | 3.708 | 0.716 |
| Tumour_cell_dist_CD8 [per 20 µm] | −0.063 | 0.087 | 1 | 0.768 | 3.776 | 0.707 |
| Tumour_cell_dist_CD8 [per 20 µm] | −0.063 | 0.087 | 1 | 0.768 | 3.776 | 0.707 |
| Tumour_cell_dist_CD8 [per 20 µm] | −0.063 | 0.087 | 1 | 0.768 | 3.776 | 0.707 |
| Low RS | | | | | | |
| B_cell_dist_CD68 [per 20 µm] | −0.213 | 0.276 | 1 | 0.600 | 0.792 | 0.992 |
| B_cell_dist_CD68 [per 20 µm] | −0.213 | 0.276 | 1 | 0.600 | 0.792 | 0.992 |
| B_cell_dist_CD68 [per 20 µm] | −0.213 | 0.276 | 1 | 0.600 | 0.792 | 0.992 |
| B_cell_dist_CD8 [per 20 µm] | 0.068 | 0.178 | 1 | 0.673 | 0.662 | 0.995 |
| B_cell_dist_CD8 [per 20 µm] | 0.068 | 0.178 | 1 | 0.673 | 0.662 | 0.995 |
| B_cell_dist_CD8 [per 20 µm] | 0.068 | 0.178 | 1 | 0.673 | 0.662 | 0.995 |
| CD20_density [per 50 cells/mm²] | −0.206 | 0.647 | 1 | 0.421 | 5.004 | 0.543 |
| CD20_density [per 50 cells/mm²] | −0.206 | 0.647 | 1 | 0.421 | 5.004 | 0.543 |
| CD20_density [per 50 cells/mm²] | −0.206 | 0.647 | 1 | 0.421 | 5.004 | 0.543 |
| CD20_per_pos [per 2%-points] | −0.269 | 2.122 | 1 | 0.145 | 6.585 | 0.361 |
| CD20_per_pos [per 2%-points] | −0.269 | 2.122 | 1 | 0.145 | 6.585 | 0.361 |
| CD20_per_pos [per 2%-points] | −0.269 | 2.122 | 1 | 0.145 | 6.585 | 0.361 |
| CD4FOXP3_density [per 50 cells/mm²] | 0.002 | 0.015 | 1 | 0.902 | 4.065 | 0.668 |
| CD4FOXP3_density [per 50 cells/mm²] | 0.002 | 0.015 | 1 | 0.902 | 4.065 | 0.668 |
| CD4FOXP3_density [per 50 cells/mm²] | 0.002 | 0.015 | 1 | 0.902 | 4.065 | 0.668 |
| CD4FOXP3_per_pos [per 2%-points] | −0.130 | 0.211 | 1 | 0.646 | 4.442 | 0.617 |
| CD4FOXP3_per_pos [per 2%-points] | −0.130 | 0.211 | 1 | 0.646 | 4.442 | 0.617 |
| CD4FOXP3_per_pos [per 2%-points] | −0.130 | 0.211 | 1 | 0.646 | 4.442 | 0.617 |
| CD4_density [per 50 cells/mm²] | 0.267 | 2.025 | 1 | 0.155 | 6.111 | 0.411 |
| CD4_density [per 50 cells/mm²] | 0.267 | 2.025 | 1 | 0.155 | 6.111 | 0.411 |
| CD4_density [per 50 cells/mm²] | 0.267 | 2.025 | 1 | 0.155 | 6.111 | 0.411 |
| CD4_per_pos [per 2%-points] | 0.167 | 0.903 | 1 | 0.342 | 4.888 | 0.558 |
| CD4_per_pos [per 2%-points] | 0.167 | 0.903 | 1 | 0.342 | 4.888 | 0.558 |
| CD4_per_pos [per 2%-points] | 0.167 | 0.903 | 1 | 0.342 | 4.888 | 0.558 |
| CD68_density [per 50 cells/mm²] | −0.205 | 1.155 | 1 | 0.282 | 5.128 | 0.528 |
| CD68_density [per 50 cells/mm²] | −0.205 | 1.155 | 1 | 0.282 | 5.128 | 0.528 |
| CD68_density [per 50 cells/mm²] | −0.205 | 1.155 | 1 | 0.282 | 5.128 | 0.528 |
| CD68_per_pos [per 2%-points] | −0.156 | 0.329 | 1 | 0.566 | 4.219 | 0.647 |
| CD68_per_pos [per 2%-points] | −0.156 | 0.329 | 1 | 0.566 | 4.219 | 0.647 |
| CD68_per_pos [per 2%-points] | −0.156 | 0.329 | 1 | 0.566 | 4.219 | 0.647 |
| CD8_density [per 50 cells/mm²] | 0.067 | 0.097 | 1 | 0.755 | 4.232 | 0.645 |
| CD8_density [per 50 cells/mm²] | 0.067 | 0.097 | 1 | 0.755 | 4.232 | 0.645 |
| CD8_density [per 50 cells/mm²] | 0.067 | 0.097 | 1 | 0.755 | 4.232 | 0.645 |
| CD8_per_pos [per 2%-points] | 0.022 | 0.005 | 1 | 0.944 | 4.110 | 0.662 |
| CD8_per_pos [per 2%-points] | 0.022 | 0.005 | 1 | 0.944 | 4.110 | 0.662 |
| CD8_per_pos [per 2%-points] | 0.022 | 0.005 | 1 | 0.944 | 4.110 | 0.662 |
| Cytotoxic_T_cell_dist_CD20 [per 20 µm] | 0.449 | 2.541 | 1 | 0.111 | 2.751 | 0.839 |
| Cytotoxic_T_cell_dist_CD20 [per 20 µm] | 0.449 | 2.541 | 1 | 0.111 | 2.751 | 0.839 |
| Cytotoxic_T_cell_dist_CD20 [per 20 µm] | 0.449 | 2.541 | 1 | 0.111 | 2.751 | 0.839 |
| Cytotoxic_T_cell_dist_CD4 [per 20 µm] | 0.417 | 2.005 | 1 | 0.157 | 3.386 | 0.759 |
| Cytotoxic_T_cell_dist_CD4 [per 20 µm] | 0.417 | 2.005 | 1 | 0.157 | 3.386 | 0.759 |
| Cytotoxic_T_cell_dist_CD4 [per 20 µm] | 0.417 | 2.005 | 1 | 0.157 | 3.386 | 0.759 |
| Cytotoxic_T_cell_dist_CD4FOXP3 [per 20 µm] | −0.227 | 1.000 | 1 | 0.317 | 1.484 | 0.961 |
| Cytotoxic_T_cell_dist_CD4FOXP3 [per 20 µm] | −0.227 | 1.000 | 1 | 0.317 | 1.484 | 0.961 |
| Cytotoxic_T_cell_dist_CD4FOXP3 [per 20 µm] | −0.227 | 1.000 | 1 | 0.317 | 1.484 | 0.961 |
| Cytotoxic_T_cell_dist_CD68 [per 20 µm] | 0.269 | 0.924 | 1 | 0.336 | 1.548 | 0.956 |
| Cytotoxic_T_cell_dist_CD68 [per 20 µm] | 0.269 | 0.924 | 1 | 0.336 | 1.548 | 0.956 |
| Cytotoxic_T_cell_dist_CD68 [per 20 µm] | 0.269 | 0.924 | 1 | 0.336 | 1.548 | 0.956 |
| Macrophage_dist_CD20 [per 20 µm] | 0.405 | 1.778 | 1 | 0.182 | 2.078 | 0.912 |
| Macrophage_dist_CD20 [per 20 µm] | 0.405 | 1.778 | 1 | 0.182 | 2.078 | 0.912 |
| Macrophage_dist_CD20 [per 20 µm] | 0.405 | 1.778 | 1 | 0.182 | 2.078 | 0.912 |
| Macrophage_dist_CD4 [per 20 µm] | 0.374 | 1.481 | 1 | 0.224 | 2.986 | 0.811 |
| Macrophage_dist_CD4 [per 20 µm] | 0.374 | 1.481 | 1 | 0.224 | 2.986 | 0.811 |
| Macrophage_dist_CD4 [per 20 µm] | 0.374 | 1.481 | 1 | 0.224 | 2.986 | 0.811 |
| Macrophage_dist_CD4FOXP3 [per 20 µm] | −0.097 | 0.229 | 1 | 0.632 | 0.757 | 0.993 |
| Macrophage_dist_CD4FOXP3 [per 20 µm] | −0.097 | 0.229 | 1 | 0.632 | 0.757 | 0.993 |
| Macrophage_dist_CD4FOXP3 [per 20 µm] | −0.097 | 0.229 | 1 | 0.632 | 0.757 | 0.993 |
| Macrophage_dist_CD8 [per 20 µm] | 0.034 | 0.024 | 1 | 0.878 | 0.599 | 0.996 |
| Macrophage_dist_CD8 [per 20 µm] | 0.034 | 0.024 | 1 | 0.878 | 0.599 | 0.996 |
| Macrophage_dist_CD8 [per 20 µm] | 0.034 | 0.024 | 1 | 0.878 | 0.599 | 0.996 |
| T_helper_dist_CD20 [per 20 µm] | 0.518 | 3.791 | 1 | 0.052 | 4.539 | 0.604 |
| T_helper_dist_CD20 [per 20 µm] | 0.518 | 3.791 | 1 | 0.052 | 4.539 | 0.604 |
| T_helper_dist_CD20 [per 20 µm] | 0.518 | 3.791 | 1 | 0.052 | 4.539 | 0.604 |
| T_helper_dist_CD4FOXP3 [per 20 µm] | −0.117 | 0.626 | 1 | 0.429 | 1.688 | 0.946 |
| T_helper_dist_CD4FOXP3 [per 20 µm] | −0.117 | 0.626 | 1 | 0.429 | 1.688 | 0.946 |
| T_helper_dist_CD4FOXP3 [per 20 µm] | −0.117 | 0.626 | 1 | 0.429 | 1.688 | 0.946 |
| T_helper_dist_CD68 [per 20 µm] | 0.158 | 0.024 | 1 | 0.877 | 1.724 | 0.943 |
| T_helper_dist_CD68 [per 20 µm] | 0.158 | 0.024 | 1 | 0.877 | 1.724 | 0.943 |
| T_helper_dist_CD68 [per 20 µm] | 0.158 | 0.024 | 1 | 0.877 | 1.724 | 0.943 |
| T_helper_dist_CD8 [per 20 µm] | 0.119 | 0.131 | 1 | 0.718 | 1.972 | 0.922 |
| T_helper_dist_CD8 [per 20 µm] | 0.119 | 0.131 | 1 | 0.718 | 1.972 | 0.922 |
| T_helper_dist_CD8 [per 20 µm] | 0.119 | 0.131 | 1 | 0.718 | 1.972 | 0.922 |
| T_reg_dist_CD20 [per 20 µm] | 0.566 | 3.907 | 1 | 0.048 | 9.159 | 0.165 |
| T_reg_dist_CD20 [per 20 µm] | 0.566 | 3.907 | 1 | 0.048 | 9.159 | 0.165 |
| T_reg_dist_CD20 [per 20 µm] | 0.566 | 3.907 | 1 | 0.048 | 9.159 | 0.165 |
| T_reg_dist_CD4 [per 20 µm] | −0.353 | 0.193 | 1 | 0.660 | 6.015 | 0.422 |
| T_reg_dist_CD4 [per 20 µm] | −0.353 | 0.193 | 1 | 0.660 | 6.015 | 0.422 |
| T_reg_dist_CD4 [per 20 µm] | −0.353 | 0.193 | 1 | 0.660 | 6.015 | 0.422 |
| T_reg_dist_CD68 [per 20 µm] | 0.691 | 2.141 | 1 | 0.143 | 8.354 | 0.213 |
| T_reg_dist_CD68 [per 20 µm] | 0.691 | 2.141 | 1 | 0.143 | 8.354 | 0.213 |
| T_reg_dist_CD68 [per 20 µm] | 0.691 | 2.141 | 1 | 0.143 | 8.354 | 0.213 |
| T_reg_dist_CD8 [per 20 µm] | −0.175 | 0.019 | 1 | 0.890 | 4.860 | 0.562 |
| T_reg_dist_CD8 [per 20 µm] | −0.175 | 0.019 | 1 | 0.890 | 4.860 | 0.562 |
| T_reg_dist_CD8 [per 20 µm] | −0.175 | 0.019 | 1 | 0.890 | 4.860 | 0.562 |
| Tumour_cell_dist_CD20 [per 20 µm] | 0.371 | 1.497 | 1 | 0.221 | 1.897 | 0.929 |
| Tumour_cell_dist_CD20 [per 20 µm] | 0.371 | 1.497 | 1 | 0.221 | 1.897 | 0.929 |
| Tumour_cell_dist_CD20 [per 20 µm] | 0.371 | 1.497 | 1 | 0.221 | 1.897 | 0.929 |
| Tumour_cell_dist_CD4 [per 20 µm] | 0.344 | 1.500 | 1 | 0.221 | 3.015 | 0.807 |
| Tumour_cell_dist_CD4 [per 20 µm] | 0.344 | 1.500 | 1 | 0.221 | 3.015 | 0.807 |
| Tumour_cell_dist_CD4 [per 20 µm] | 0.344 | 1.500 | 1 | 0.221 | 3.015 | 0.807 |
| Tumour_cell_dist_CD4FOXP3 [per 20 µm] | −0.061 | 0.168 | 1 | 0.682 | 0.661 | 0.995 |
| Tumour_cell_dist_CD4FOXP3 [per 20 µm] | −0.061 | 0.168 | 1 | 0.682 | 0.661 | 0.995 |
| Tumour_cell_dist_CD4FOXP3 [per 20 µm] | −0.061 | 0.168 | 1 | 0.682 | 0.661 | 0.995 |
| Tumour_cell_dist_CD68 [per 20 µm] | 0.048 | 0.009 | 1 | 0.923 | 0.599 | 0.996 |
| Tumour_cell_dist_CD68 [per 20 µm] | 0.048 | 0.009 | 1 | 0.923 | 0.599 | 0.996 |
| Tumour_cell_dist_CD68 [per 20 µm] | 0.048 | 0.009 | 1 | 0.923 | 0.599 | 0.996 |
| Tumour_cell_dist_CD8 [per 20 µm] | 0.016 | 0.004 | 1 | 0.947 | 0.670 | 0.995 |
| Tumour_cell_dist_CD8 [per 20 µm] | 0.016 | 0.004 | 1 | 0.947 | 0.670 | 0.995 |
| Tumour_cell_dist_CD8 [per 20 µm] | 0.016 | 0.004 | 1 | 0.947 | 0.670 | 0.995 |
